# Supplementary material
Source: PubMed Central journal article supplement (PMC9612800)
Supplement: awac020_supplementary_data.pdf [file awac020_supplementary_data.pdf]

## **Supplementary materials and methods**

### **Genotyping**

In brief, the 252 bp DNA fragment containing rs2270363 was amplified by PCR. And the unincorporated dNTPs and primers were removed with Phosphatase (SAP, Takara, Cat. No: 2720) and extranuclease I (ExoI, Takara, Cat. No: 2650A). The PCR products were then used as templates for single base extension (to genotype rs2270363), with the use of different fluorescence labeled ddNTPs. ABI 3730XL sequencer (Applied Biosystems, USA) was used to read out the genotype of the sample according to the color of the incorporated ddNTP and the results were analyzed by GeneMapper software (Applied Biosystems, USA). We used Sanger sequencing to validate genotyping results. In addition, SNPs failed to be genotyped with SNaPshot method were also genotyped with Sanger sequencing. All primer sequences are listed in **Supplementary Table 11**.

### **Dual-luciferase reporter gene assays**

HEK-293T, SH-SY5Y and SK-N-SH cells were plated onto 96-well plates at a density of  $2 \times 10^4$ ,  $6 \times 10^4$  and  $6.5 \times 10^4$  cells/well, respectively. The pRL-TK (internal control, 50 ng, Promega, Cat. No: E2241) and the recombinant vectors (150 ng) were co-transfected into the cells using the Lipofectamine<sup>TM</sup> 3000 transfection reagent (Invitrogen, Cat. No: L3000-015). 48 hours post-transfection, the luciferase activity was determined with the Dual-Luciferase Reporter Assay System (Promega, Cat. No: E1980) and the Luminoskan Ascent chemiluminescence analyzer (Thermo scientific, Thermo Luminoskan Ascent). All primer sequences are listed in **Supplementary Table 12**.

## **Electrophoretic mobility shift assay**

The 3' end of the oligonucleotides were labeled with biotin using the EMSA Probe Biotin Labeling Kit (Beyotime, Cat. No: GS008), and single-strand oligonucleotides were annealed to form double-stranded complementary sequences. The Chemiluminescent EMSA Kit (Beyotime, Cat. No: GS009) was used to perform the EMSA according the manufacturer's instructions. Briefly, 50 fM probes were incubated with nuclear extracts for 20 minutes. The resultant incubation solution were then subjected to electrophoresis on 6.5% non-denaturing polyacrylamide gels with  $0.5 \times$  Tris borate/EDTA and electro-transfer to nylon membrane (Millipore, Cat. No: INYC00010). After UV cross-linking, the membrane was incubated with Streptavidin-HRP Conjugate and images were taken using the Mini chemi610 imaging system (SAGECREATION).

## **Knockdown and overexpression experiments**

The short hairpin RNAs (shRNAs) were designed using two online shRNA design tools (<https://rnaidesigner.thermofisher.com/rnaiexpress/sort.do> or <https://www.sigmaaldrich.com/china-mainland/zh/life-science/functional-genomics-and-rnai/shrna/individual-genes.html>). shRNAs targeting *USF1* (human), *MAX* (human) and *Nmrall* (mouse) were cloned into pLKO.1-EGFP-Puro vector. And shRNAs targeting *Nmrall* (rat) were ligated to pSicoR-Ef1a-mCh-puro vector. HEK293T were co-transfected with 10  $\mu$ g shRNA pLKO.1-EGFP-Puro vector or *NMRALI*-OE-plenti-CAG -IRES-GFP, 5  $\mu$ g psPAX-2 and 2  $\mu$ g pMD2.G. Lentiviral particles were concentrated using Lenti-X Concentrator (Takara, Cat. No: 631231) for infecting mNSCs. 48 hours post-infection, the cells that stably expressing shRNA were selected with 2  $\mu$ g/mL puromycin (Sigma, Cat. No: 540222) for 14 days. The cells that stably expressing *NMRALI* were selected with 200  $\mu$ g/mL G418 (Sangon biotech, Cat. No: B540723-0005) for 7 days.

## **RNA sequencing**

Transcriptome of the wild type mNSCs and *Nmral1* knocked-down mNSCs were sequenced as previously described<sup>1,2</sup>. Total RNA was isolated using TRIzol reagents (Life technologies, Cat. No: 15596018). RNA purity was assessed with the kaiaoK5500®Spectrophotometer (Kaiao, China). RNA integrity and concentration were evaluated using the RNA Nano 6000 Assay Kit of the Bioanalyzer 2100 system (Agilent Technologies, USA). RNA sequencing data were generated with the Illumina NovaSeq 6000 platform. DESeq2 was used to identify the differentially expressed genes (DEGs).<sup>3</sup> Gene Ontology (GO) enrichment analysis and Kyoto Encyclopedia of Genes and Genomes (KEGG) enrichment analysis were then performed using Metascape (<https://metascape.org>).<sup>4</sup>

## **5-Ethynyl-2'-deoxyuridine (EdU) proliferation and CCK-8 assays**

For the EdU proliferation assay,  $1.5 \times 10^5$  mNSCs cells were plated onto 24-well plates which were pre-coated with Laminin (Sigma, 20  $\mu\text{g}/\text{mL}$ , Cat. No: L2020-1mg). After culturing for 48 hours, EdU (RIBOBIO, Cat. No: C00053) was added to a final concentration of 20  $\mu\text{g}/\text{mL}$  and incubated for 1 hour. The EdU positive cells were detected using The Cell-Light EdU Apollo567 In Vitro Kit (RIBOBIO, Cat. No: C10310-1) strictly according to the instructions.

For CCK-8 assay,  $1.8 \times 10^4$  mNSCs cells were seeded onto 96-well plates which were pre-coated with Laminin (Sigma, 20  $\mu\text{g}/\text{mL}$ , Cat. No: L2020-1mg). After incubating for 0, 24, 48 and 72 hours, 10  $\mu\text{L}$  CCK-8 (Beyotime, Cat. No: C0042) reagent was added to each well and incubated for 2 hours. The absorbance was then detected at 450 nm with a Spectrophotometer (BioTek, USA).

## **Immunofluorescence staining**

The mNSCs cells were fixed with 4% Paraformaldehyde (PFA) for 15 min and

permeabilized using PBS with 0.3% Triton (PBST) for 15 min at room temperature. The cells were then blocked with blocking buffer (Beyotime, Cat. No: P0102) at room temperature for 1 hour. Subsequently, primary antibodies were incubated at 4 °C for overnight. Secondary antibodies were then incubated at room temperature for 1 hour (in dark room). Before taking images, the cells were counterstained with DAPI for 15 min, and photographed using FluoView™ FV1000 Laser Scanning Confocal Microscopy (Olympus) and LSM 880 Basic Operation (Carl Zeiss, Germany). The primary antibodies used in this study were: PAX6 (Milipore, 1:500, Cat. No: ab2237), NESTIN (Chemicon, 1:500, Cat. No: mab353), SOX2 (Santa Cruz, 1:200, Cat. No: sc-17320), GFAP (Sigma, 1:1000, Cat. No: G9269), MAP2 (Millipore, 1:200, Cat. No: AB5622), Chicken polyclonal GFP antibody (Abcam, Cat. No: ab13970), and Rabbit polyclonal mCherry antibody (GeneTex, Cat. No: GTX128508).

## **Meta-analysis**

A meta-analysis was performed by combining our Chinese samples with the EUR and EAS samples.<sup>5</sup> A total of 60,136 cases and 86,647 controls were included in the meta-analysis, including the EUR samples (33,640 cases and 43,456 controls), the EAS samples (22,778 cases and 35,362 controls) and our Chinese samples (3,718 cases and 7,829 controls) (**Table 1**).

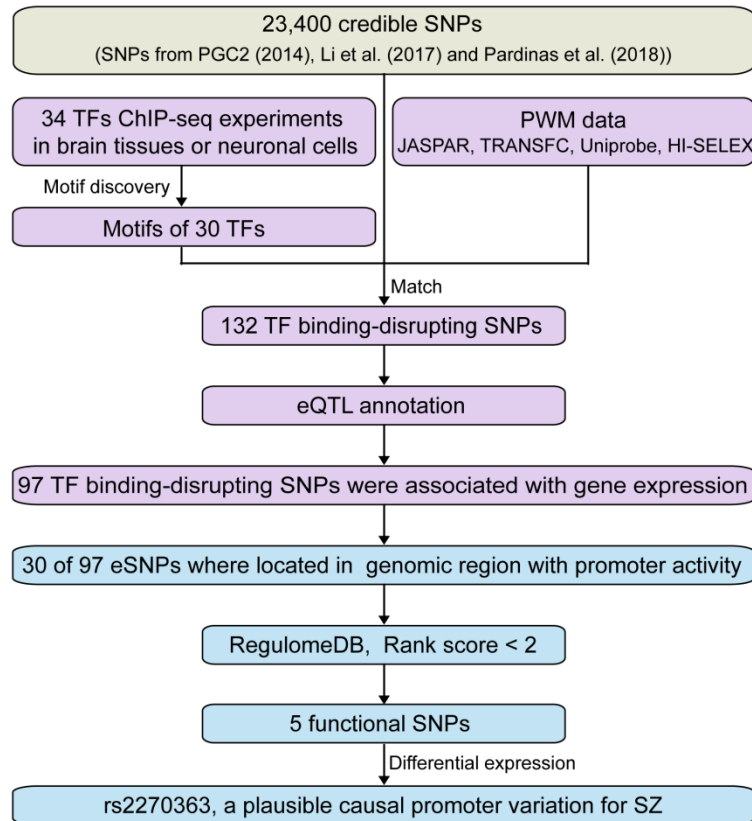

**Supplementary Figure 1. Functional SNP screening prioritized rs2270363 as a potential causal variant.** Our previous functional genomics study identified 132 TF binding-disrupting risk SNPs with functional consequences.<sup>6</sup> Among these SNPs, 97 showed associations with gene expression in the human brain (these SNPs are called eSNPs). And 30 out of 97 eSNPs are located in the promoter region and marked with H3K4me3 (a marker for active promoters) in UCSC genome browser (<http://genome.ucsc.edu/>), implying that these SNPs may affect promoter activity. We further used RegulomeDB and pinpointed 5 high-confidence (RegulomeDB rank score < 2) functional SNPs.<sup>7</sup> Finally, differential expression of the eQTL genes of the 5 SNPs (located in the promoter region) were examined in schizophrenia cases and controls.<sup>8</sup> The expression of the eQTL genes of rs223387 did not show significant change in SZ cases and controls. We noticed that rs2269524 is in high linkage disequilibrium ( $r^2 > 0.95$ ) with rs1801311, a functional SNP whose regulatory mechanisms in schizophrenia have been recently reported.<sup>1</sup> Thus, we did not investigate rs1801311 in this study. Two eQTL genes (*FAM109B* and *LINC00634*) of rs2269524, two eQTL genes (*NDUFA2* and *SRA1*) of rs3822346, and two eQTL genes (*NMRAL1* and *CORO7*) of rs2270363 showed differential expression in SZ cases compared with controls (Supplementary Table 8). However, we noted that three SNPs (rs2269524, rs1801311 and rs3822346) are far away from their differentially expressed eQTL genes and are not located in the promoter regions of their differentially expressed eQTL genes, suggesting that they are unlikely regulate the expression of these genes by affecting the promoter activity. For example, our previous study showed that rs1801311, which is located in the first exon of *NDUFA6*,

may confer schizophrenia risk by regulating the expression of the distal gene *NAGA* (an eQTL gene of rs1801311) rather than *NDUFA6*<sup>1</sup>. Interestingly, rs2270363, which is located in the *NMRAL1* promoter region, was associated with *NMRAL1* expression in the human brain, and *NMRAL1* expression was down-regulated in SZ cases compared with controls. This suggests that rs2270363 may regulate the expression of *NMRAL1* by modulating promoter activity. These lines of evidence suggested rs2270363 as a plausible causal variant for SZ at the 16p13.3 risk locus.

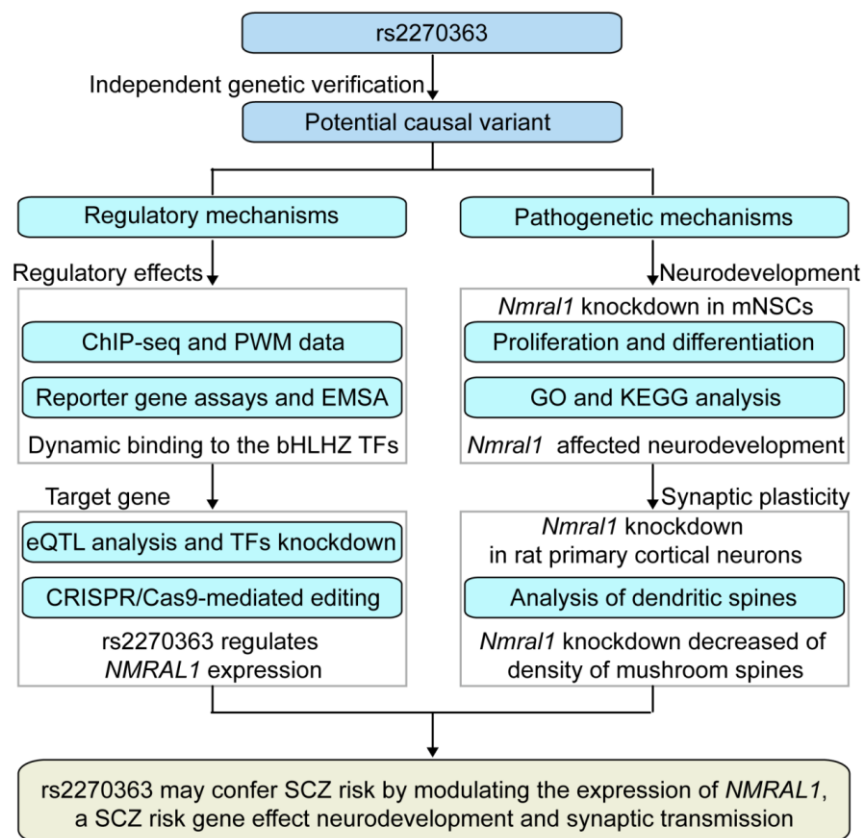

**Supplementary Figure 2. Overview of this study.** In this study, we firstly verified that rs2270363 was significantly associated with SCZ in China population. To explore the regulatory mechanisms of rs2270363, we leveraged a series of assays, including reporter gene assays and EMSA, as well as TF knockdown and CRISPR-Cas9-mediated genome editing. We showed that rs2270363 plays a role in regulating transcriptional activity through dynamic binding to the bHLHZ proteins. Besides, we identified the potential target gene of rs2270363 using eQTLs analysis, CRISPR/Cas9-mediated editing and TFs knockdown. Further functional studies showed that *Nmral1* knockdown affects proliferation and differentiation of neural stem cells, pathways related to neurodevelopment, and density of mushroom spines. In summary, our study demonstrates that rs2270363 may confer SCZ risk by modulating the expression of *NMRAL1*, a SCZ risk gene that affects neurodevelopment and synaptic transmission.

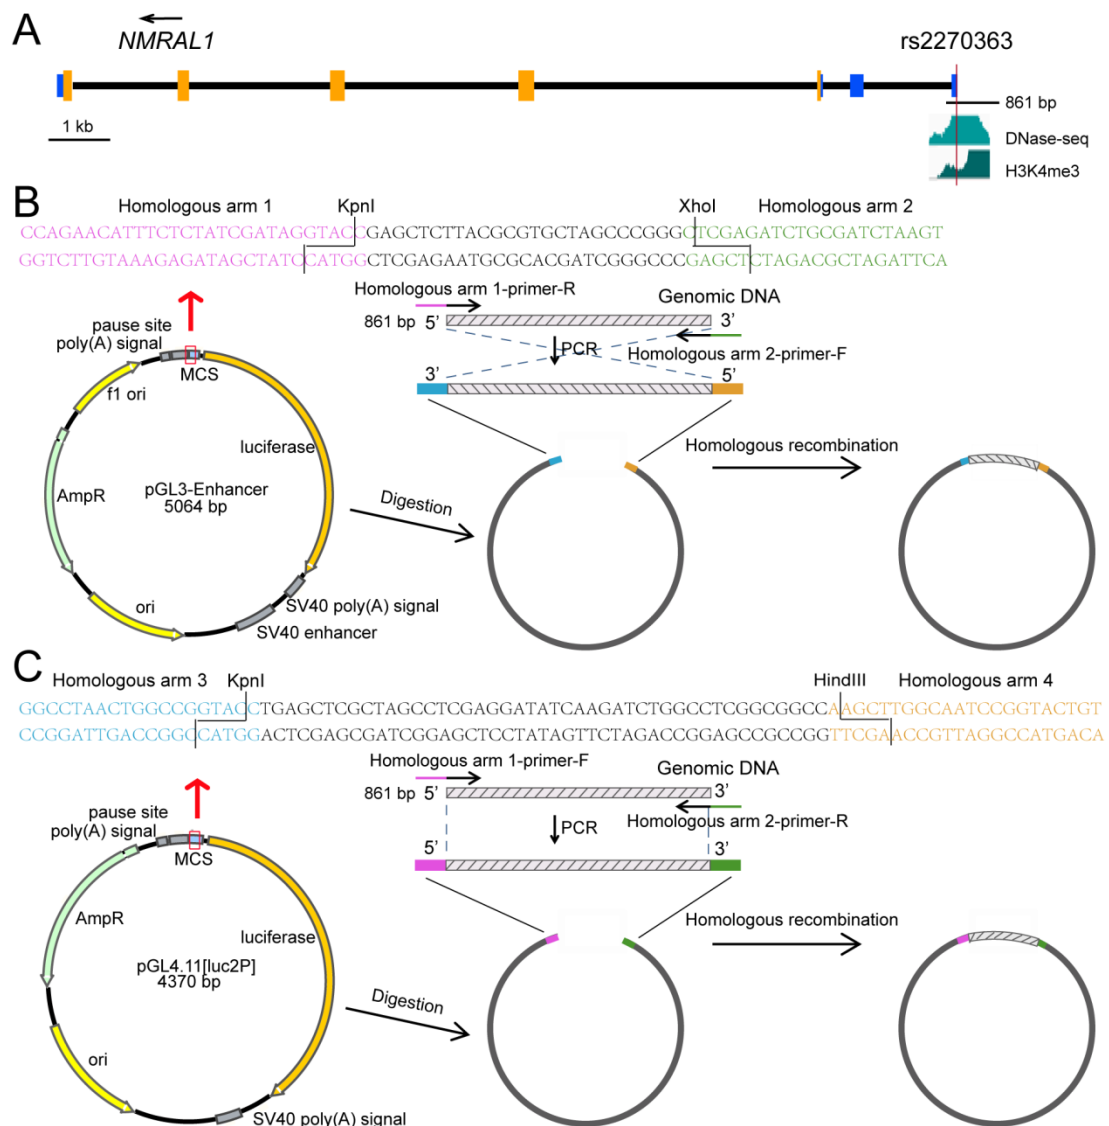

**Supplementary Figure 3. Vectors design of dual-luciferase reporter gene assays.** (A) The 861 bp DNA fragment (containing rs2270363), which was marked with H3K4me3 and located in open chromatin regions in SK-N-SH cell lines, was selected for dual-luciferase reporter gene assays. (B, C) Diagram of the construction of the recombinant vectors for reporter gene assays. The orientation of the fragment in pGL3-Enhancer was the same as that of the transcription of the *NMRAL1* for A. The orientation of the fragment in pGL4.11 was opposite to that of the transcription of the *NMRAL1* for B.

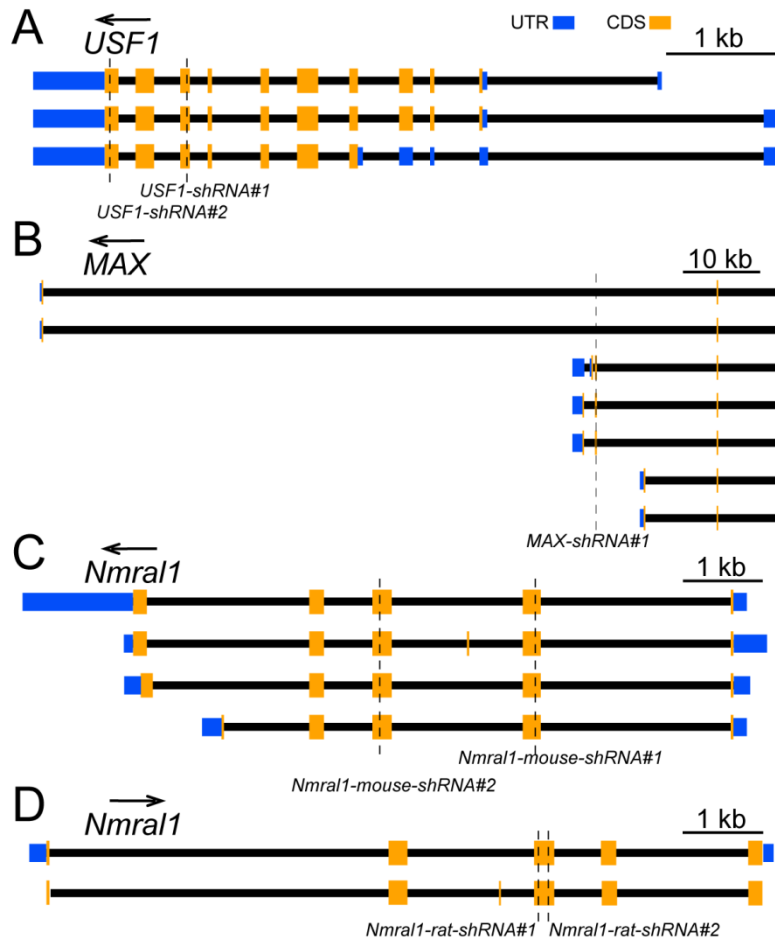

**Supplementary Figure 4. The regions targeted by the designed shRNAs. (A, B)** The regions targeted by the *USF1* and *MAX* shRNAs (human). (C) The regions targeted by the *Nmr1l1* shRNAs (mouse). (D) The regions targeted by the *Nmr1l1* shRNAs (rat).



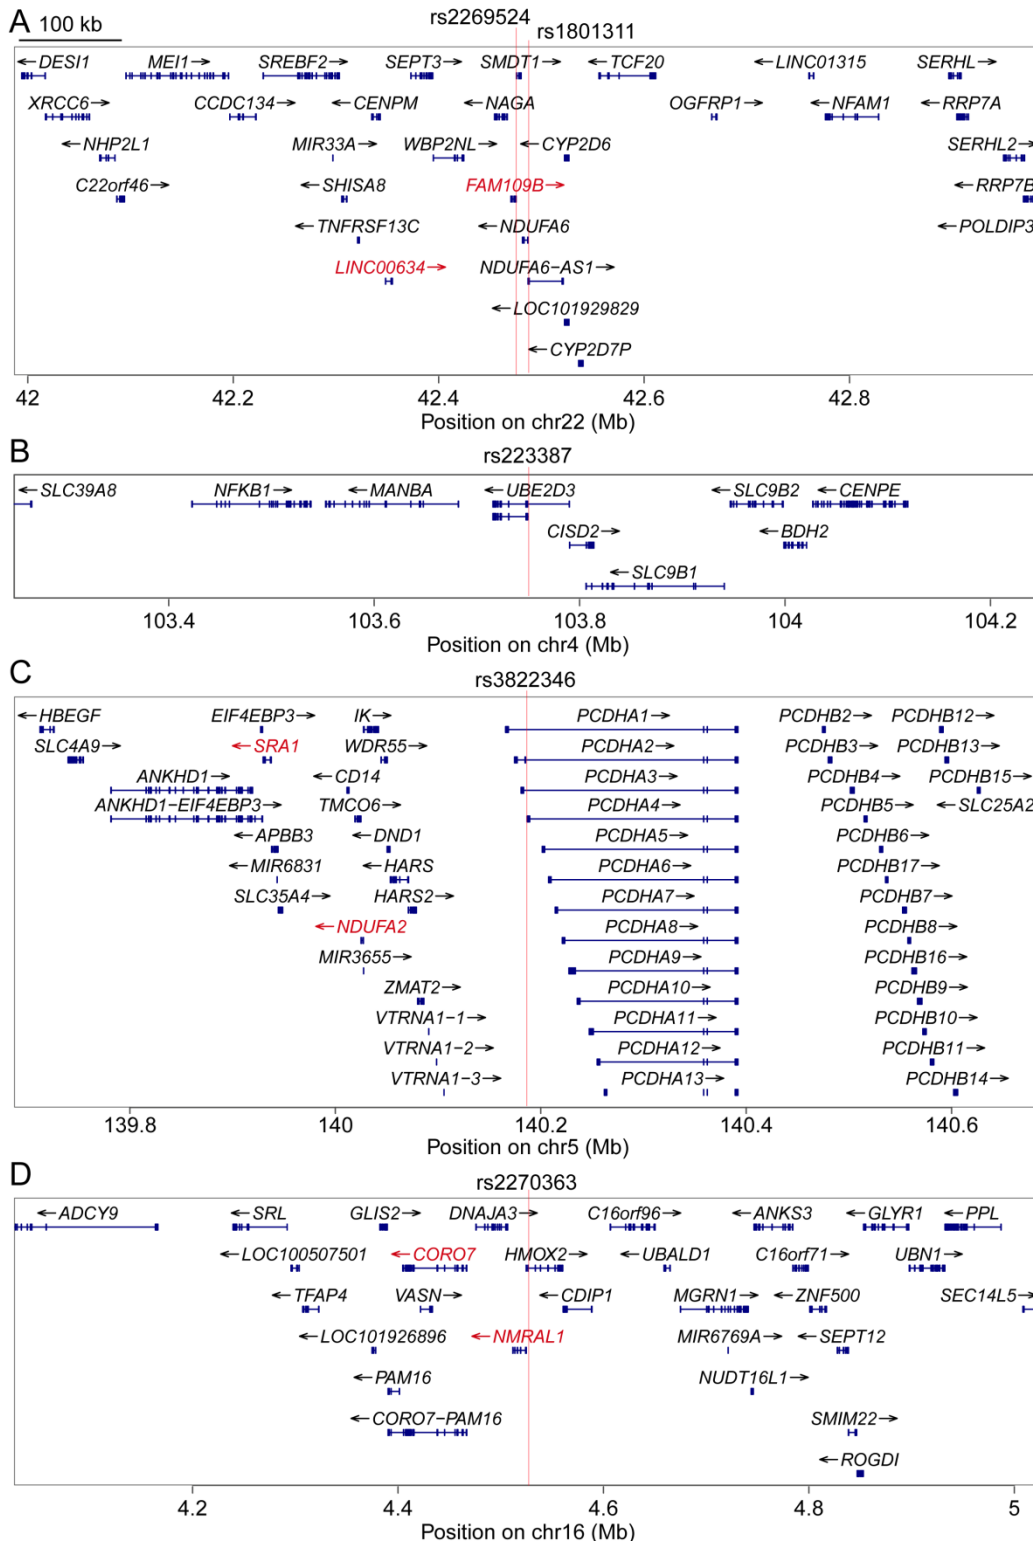

**Supplementary Figure 5. The genomic region (1 Mb) containing 5 high-confidence functional SNPs.** (A) rs1801311 is located in the *NDUFA6* promoter region, and rs2269524 is located in the *SMDT1* promoter region. (B) rs223387 is located in the *UBE2D3* promoter region. (C) rs3822346 is located in the *PCDHA4* promoter region. (D) rs2270363 is located in the *NMRAL1* promoter region. rs2269524, rs1801311 and rs3822346 are far away from their differentially expressed eQTL genes (red font) in the genome.

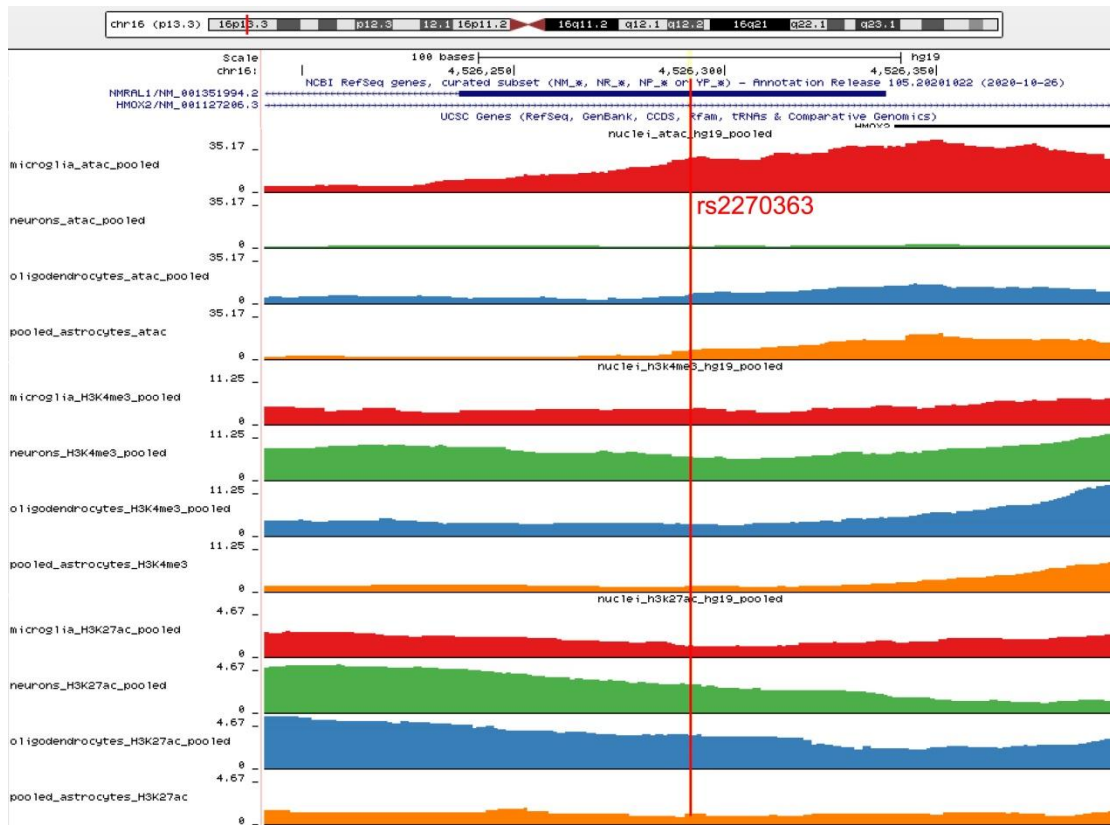

**Supplementary Figure 6. rs2270363 is located in a genomic region marked with H3K4me3 (a marker for promoters) and H3K27ac (a marker for enhancer) signals in human microglia, neurons and oligodendrocytes. Data were from Nott et al.<sup>9</sup>**

■ High H3K4me3  
■ High H3K27ac  
■ High DNase  
■ High CTCF

| cell type                                                               | tissue |
|-------------------------------------------------------------------------|--------|
| A172                                                                    | brain  |
| Ammon's horn male adult 84 years                                        | brain  |
| angular gyrus female adult 75 years                                     | brain  |
| angular gyrus male adult 81 years                                       | brain  |
| astrocyte                                                               | brain  |
| astrocyte of the cerebellum                                             | brain  |
| astrocyte of the hippocampus                                            | brain  |
| BE2C                                                                    | brain  |
| bipolar neuron originated from GM23338 treated with doxycycline hyclate | brain  |

| cell type                                                     | tissue       |
|---------------------------------------------------------------|--------------|
| brain male embryo 122 days                                    | brain        |
| brain male embryo 72 days and male embryo 76 days             | brain        |
| brain microvascular endothelial cell                          | blood vessel |
| brain pericyte                                                | blood vessel |
| caudate nucleus female adult 75 years                         | brain        |
| caudate nucleus male adult                                    | brain        |
| cerebellar cortex male adult 78 years and male adult 84 years | brain        |
| cerebellum male adult 53 years                                | brain        |
| choroid plexus epithelial cell                                | brain        |
| cingulate gyrus female adult 75 years                         | brain        |

| cell type                                                     | tissue |
|---------------------------------------------------------------|--------|
| cingulate gyrus male adult 81 years                           | brain  |
| Daoy                                                          | brain  |
| germinal matrix male embryo 20 weeks                          | brain  |
| globus pallidus male adult 78 years and male adult 84 years   | brain  |
| GM23338 male adult 53 years originated from fibroblast of arm | brain  |
| H4                                                            | brain  |
| H54                                                           | brain  |
| layer of hippocampus female adult 75 years                    | brain  |
| layer of hippocampus male adult 73 years                      | brain  |
| layer of hippocampus male adult 81 years                      | brain  |

| cell type                                                                                             | tissue |
|-------------------------------------------------------------------------------------------------------|--------|
| M059J                                                                                                 | brain  |
| medulloblastoma                                                                                       | brain  |
| mid-neurogenesis radial glial cells genetically modified using stable transfection originated from H9 | brain  |
| middle frontal area 46 female adult 75 years                                                          | brain  |
| middle frontal area 46 male adult 81 years                                                            | brain  |
| middle frontal gyrus male adult 78 years                                                              | brain  |
| neural cell                                                                                           | brain  |
| neural cell originated from H1-hESC                                                                   | brain  |
| neural progenitor cell originated from H9                                                             | brain  |
| neuron originated from H9                                                                             | brain  |

| cell type                                                                           | tissue       |
|-------------------------------------------------------------------------------------|--------------|
| putamen male adult 78 years                                                         | brain        |
| radial glial cell genetically modified using stable transfection originated from H9 | brain        |
| SK-N-DZ                                                                             | brain        |
| SK-N-DZ treated with dimethyl sulfoxide                                             | brain        |
| SK-N-MC                                                                             | brain        |
| SK-N-SH                                                                             | brain        |
| SK-N-SH treated with all-trans-retinoic acid                                        | brain        |
| smooth muscle cell of the brain vasculature female                                  | blood vessel |
| substantia nigra female adult 75 years                                              | brain        |
| substantia nigra male adult 81 year                                                 | brain        |

| cell type                            | tissue |
|--------------------------------------|--------|
| substantia nigra male adult 81 years | brain  |
| temporal lobe female adult 75 years  | brain  |
| temporal lobe male adult 81 year     | brain  |
| temporal lobe male adult 81 years    | brain  |

**Supplementary Figure 7. rs2270363 is located in a genomic region marked with H3K4me3 (a marker for promoters) and H3K27ac (a marker for enhancer) signals in human brain tissues and neural cells (including neuroblastoma cell lines). Red indicates high H3K4me3 signal, yellow indicates H3K27ac signal, green indicates DNase signal, and blue indicate CTCF signal. Data were from ENCODE.<sup>10</sup>**

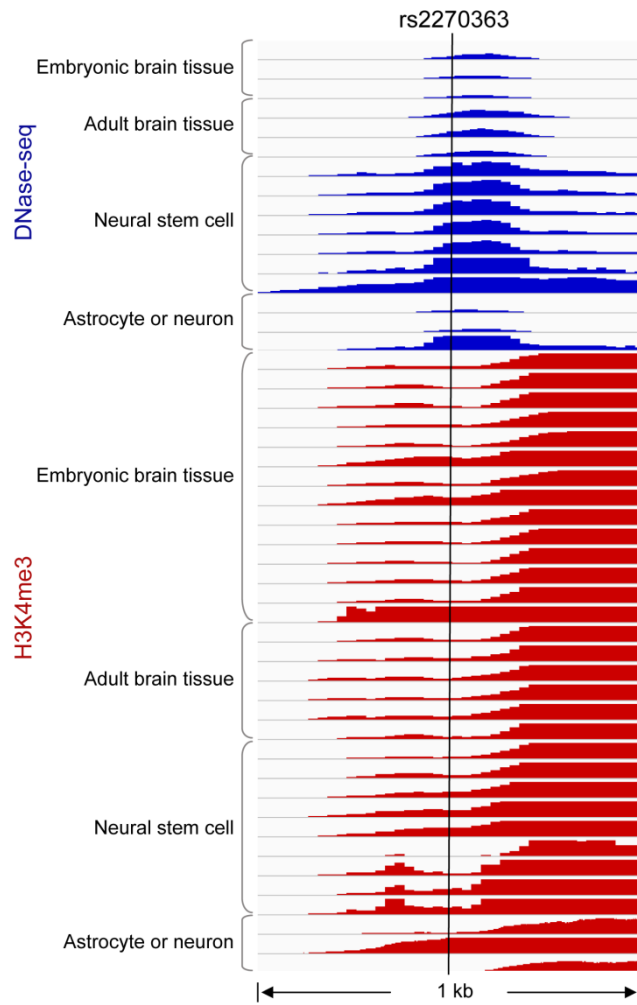

**Supplementary Figure 8. DNase-Seq and H3K4me3 signals surrounding rs2270363 in human brain tissues and neural cells. Data were from ENCODE.<sup>10</sup>**

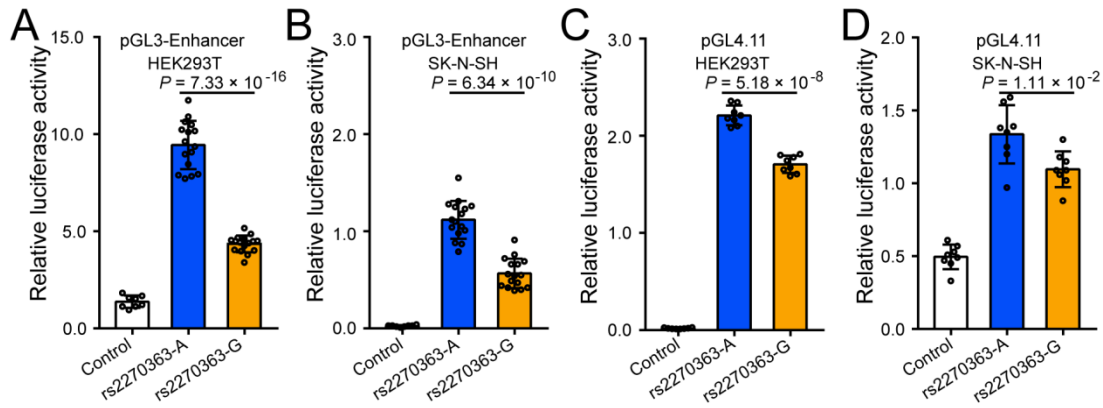

**Supplementary Figure 9. Dual-luciferase reporter gene assays.** (A-D) Dual-luciferase reporter gene assays for HEK293T and SK-N-SH cells. HEK293T and SK-N-SH cells were transfected with pGL3-Enhancer control vector and pGL3-Enhancer recombinant vector containing rs2270363 alleles for **A** and **B**. HEK293T and SK-N-SH cells were transfected with pGL4.11 control vector and pGL4.11 recombinant vector containing rs2270363 alleles for **C** and **D**. n = 8 for control group in **A** and **B**, n = 16 for experimental group in **A** and **B**, n = 8 for **C** and **D**. Unpaired two-tailed *Student's t*-test was used to test if the difference reached significance level ( $P = 0.05$ ).

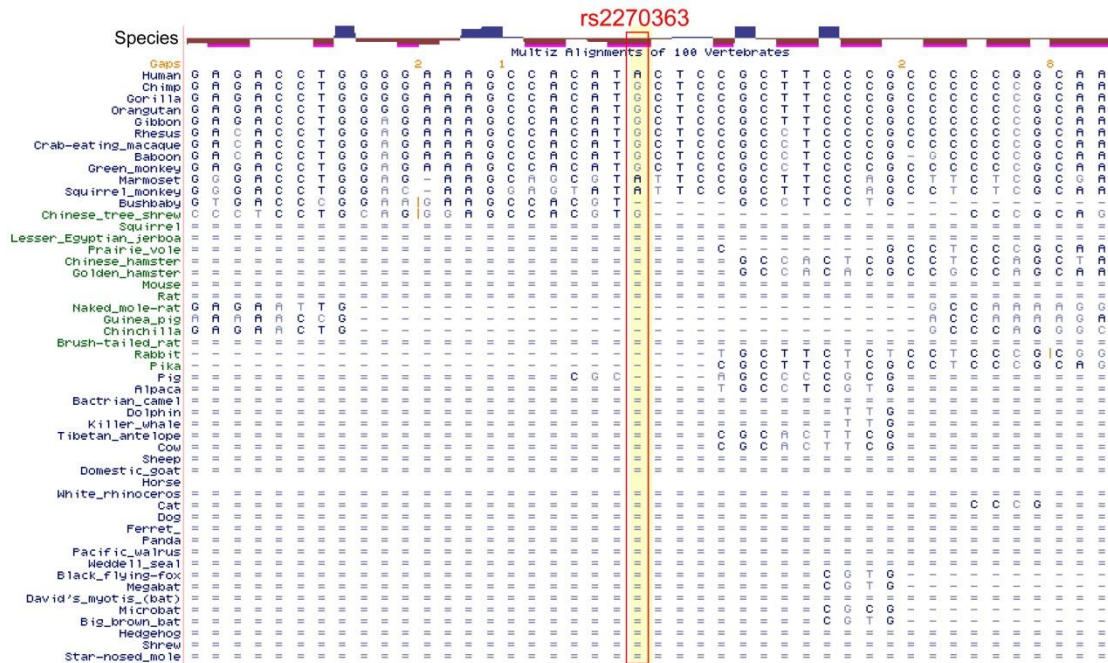

**Supplementary Figure 10. Sequence conservation of genomic region containing rs2270363.** rs2270363 was marked by red box. Data were from UCSC genome browser (<http://genome.ucsc.edu/>).

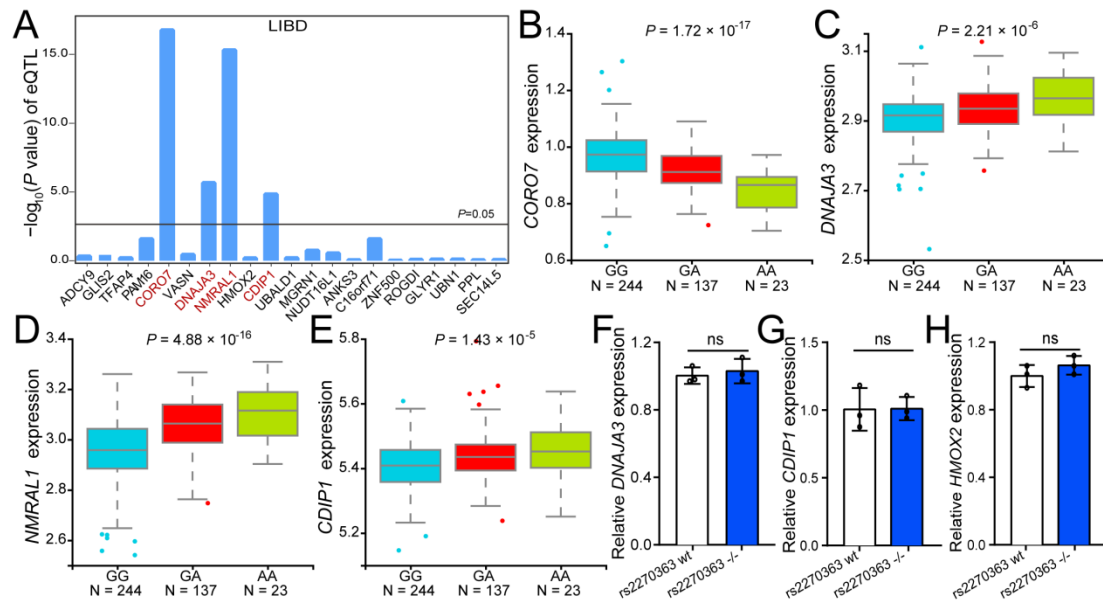

**Supplementary Figure 11. Association significance between rs2270363 and its nearby genes in the human brain.** (A) eQTL analysis of genes within 1 Mb window. Data were from LIBD,  $n = 412$ .<sup>11</sup> (B-E) The box-plot of eQTL analysis. A allele of rs2270363 corresponds to lower expression of *CORO7*, and corresponds to higher expression of *NMRAL1*, *DNAJA3*, *CDIP1*. Data were from LIBD,  $n = 404$ .<sup>11</sup> (F-H) qPCR validation of *DNAJA3*, *CDIP1* and *HMOX2* expression in rs2270363 knock-out HEK-293T cells. Unpaired two-tailed *Student's t*-test was used in this study.  $n = 3$ . Data are represented as mean  $\pm$  SD. ns, not significant.



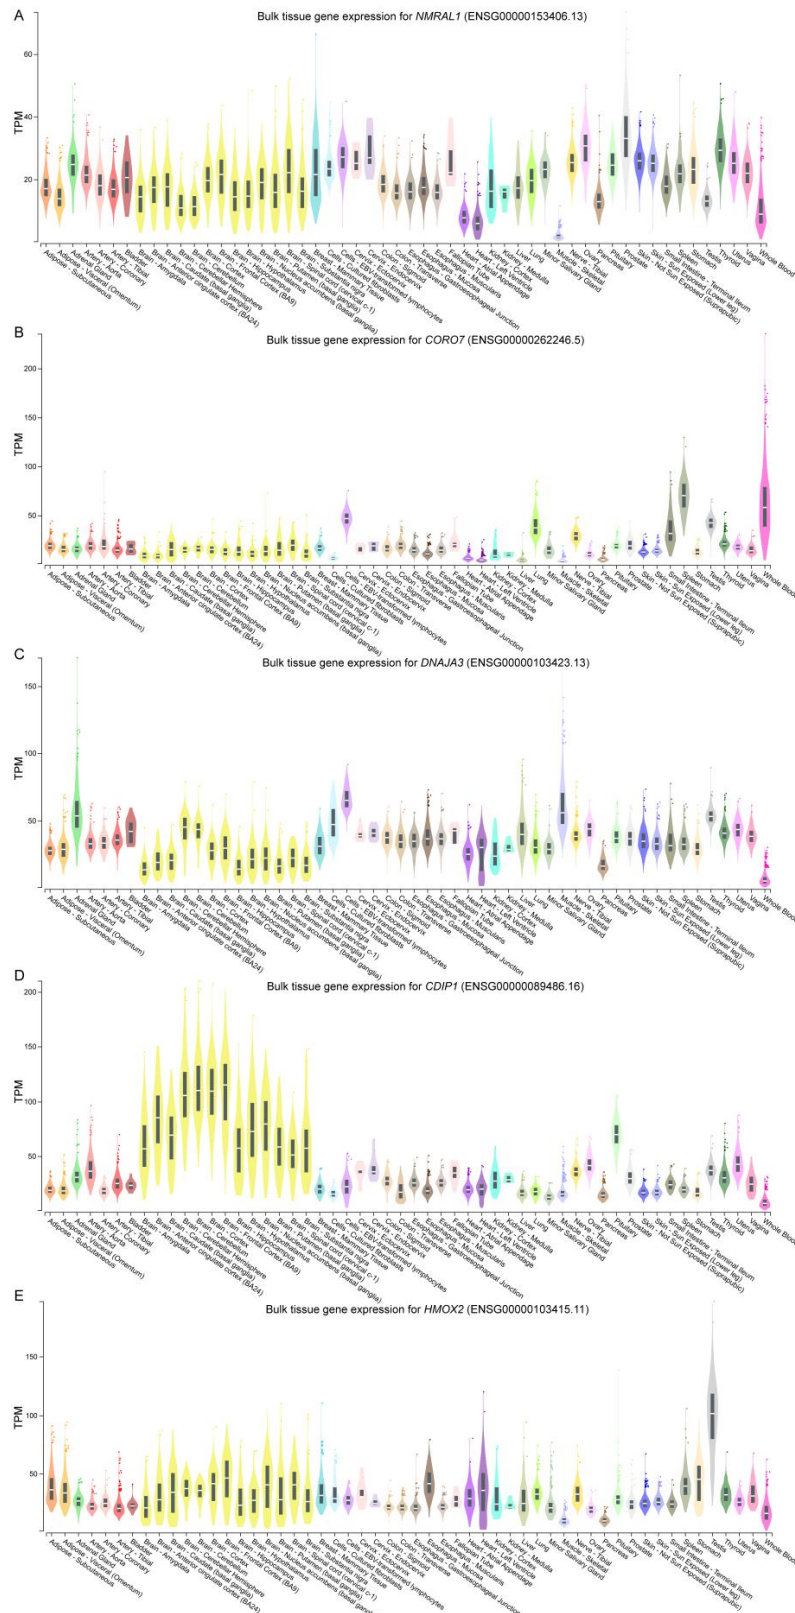

**Supplementary Figure 12. *NMRAL1*, *CORO7*, *DNAJA3*, *CDIP1* and *HMOX2* are widely expressed in different tissues. (A-C) *NMRAL1*, *CORO7* and *DNAJA3* are widely expressed in various tissues, and the expression of *CDIP1* has low human brain regional specificity (D). (E) *HMOX2* is widely expressed in various tissues. Data were from GTEx Portal.<sup>12</sup>**





**Supplementary Figure 13. *NMRAL1*, *CORO7*, *DNAJA3*, *CDIP1* and *HMOX2* are expressed in different cell types. (A-E) *NMRAL1*, *CORO7*, *DNAJA3*, *CDIP1* and *HMOX2* are widely expressed in various cell types, including SH-SY5Y and HEK293 cell lines. Data were from the Human Protein Atlas.<sup>13</sup>**

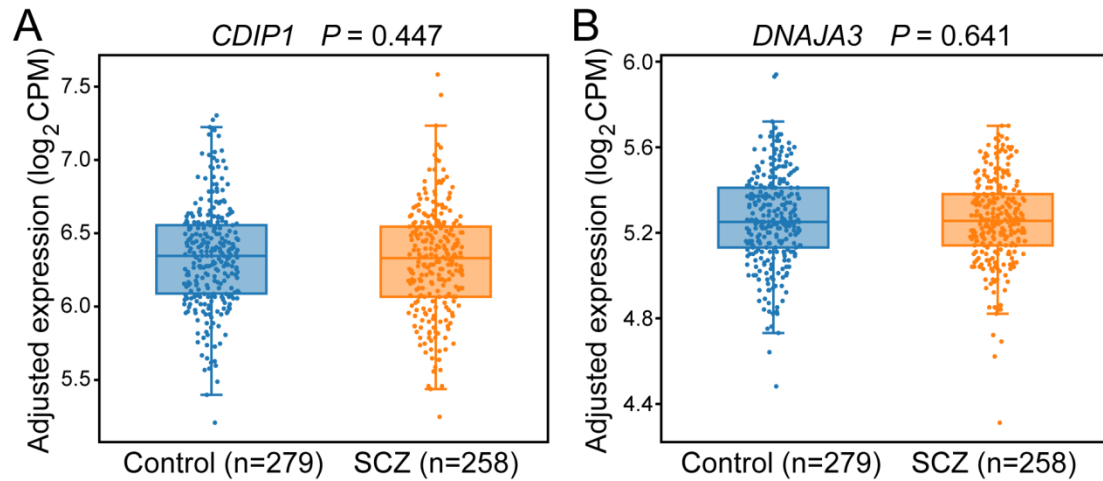

**Supplementary Figure 14. The expression of *DNAJA3* and *CDIP1* did not show significant change in brains of SZ cases compared with controls. CMC expression data were extracted from SZDB2.0.<sup>14</sup>**

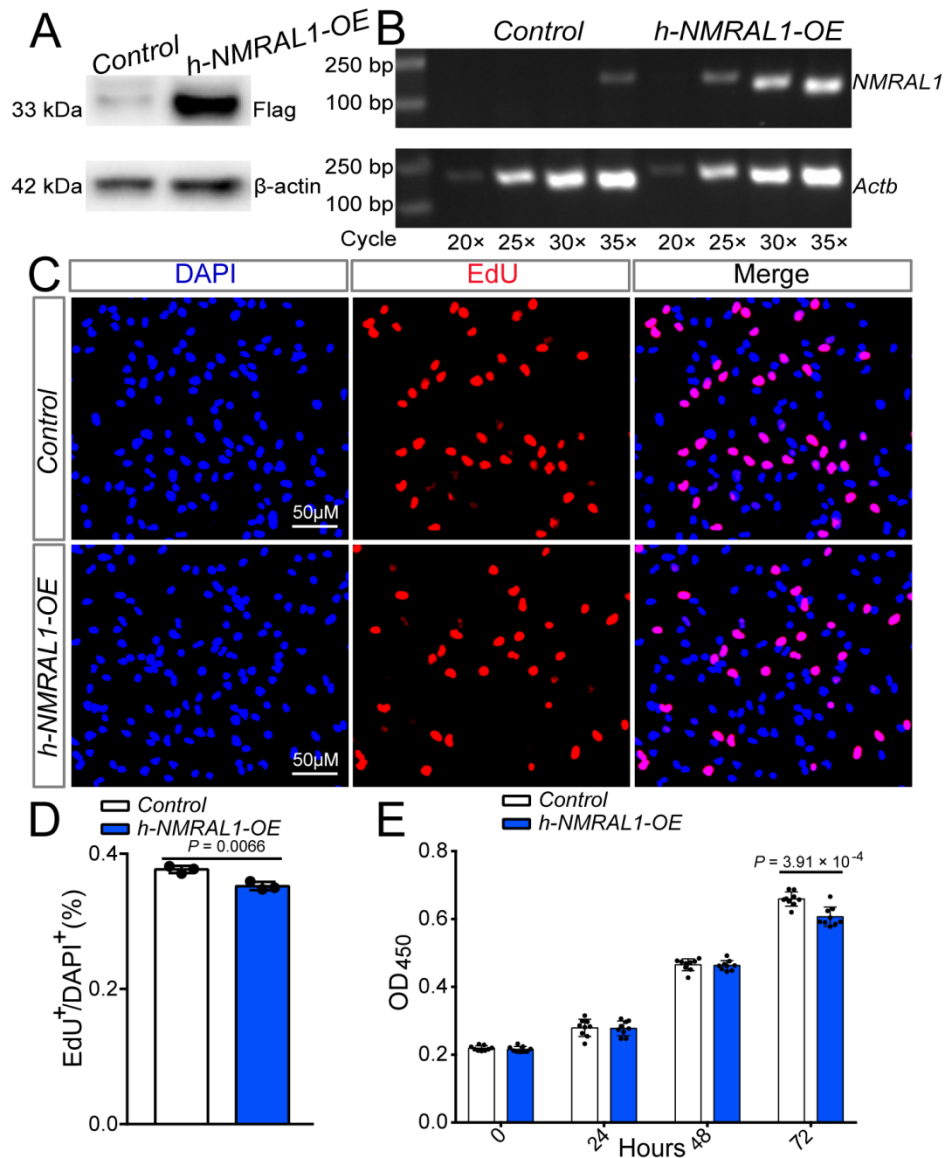

**Supplementary Figure 15. *NMRAL1* overexpression significantly inhibited proliferation of the mNSCs.** (A) Validation of *NMRAL1* overexpression in mouse NSCs with Western-blot and RT-PCR (B). (C) Immunofluorescence staining for EdU incorporation assay. Red indicates EdU positive cells, and DAPI was used to stain the nucleus (blue). (D) The quantification results of the EdU incorporation assay. (E) The results of CCK-8 assay. Data were measured at four different time points, 0, 24, 48 and 72 hours. Unpaired two-tailed *Student's t*-test was used to compare if the difference was significant.  $n = 3$  for B-D;  $n = 9$  for E. Data are represented as mean  $\pm$  SD.

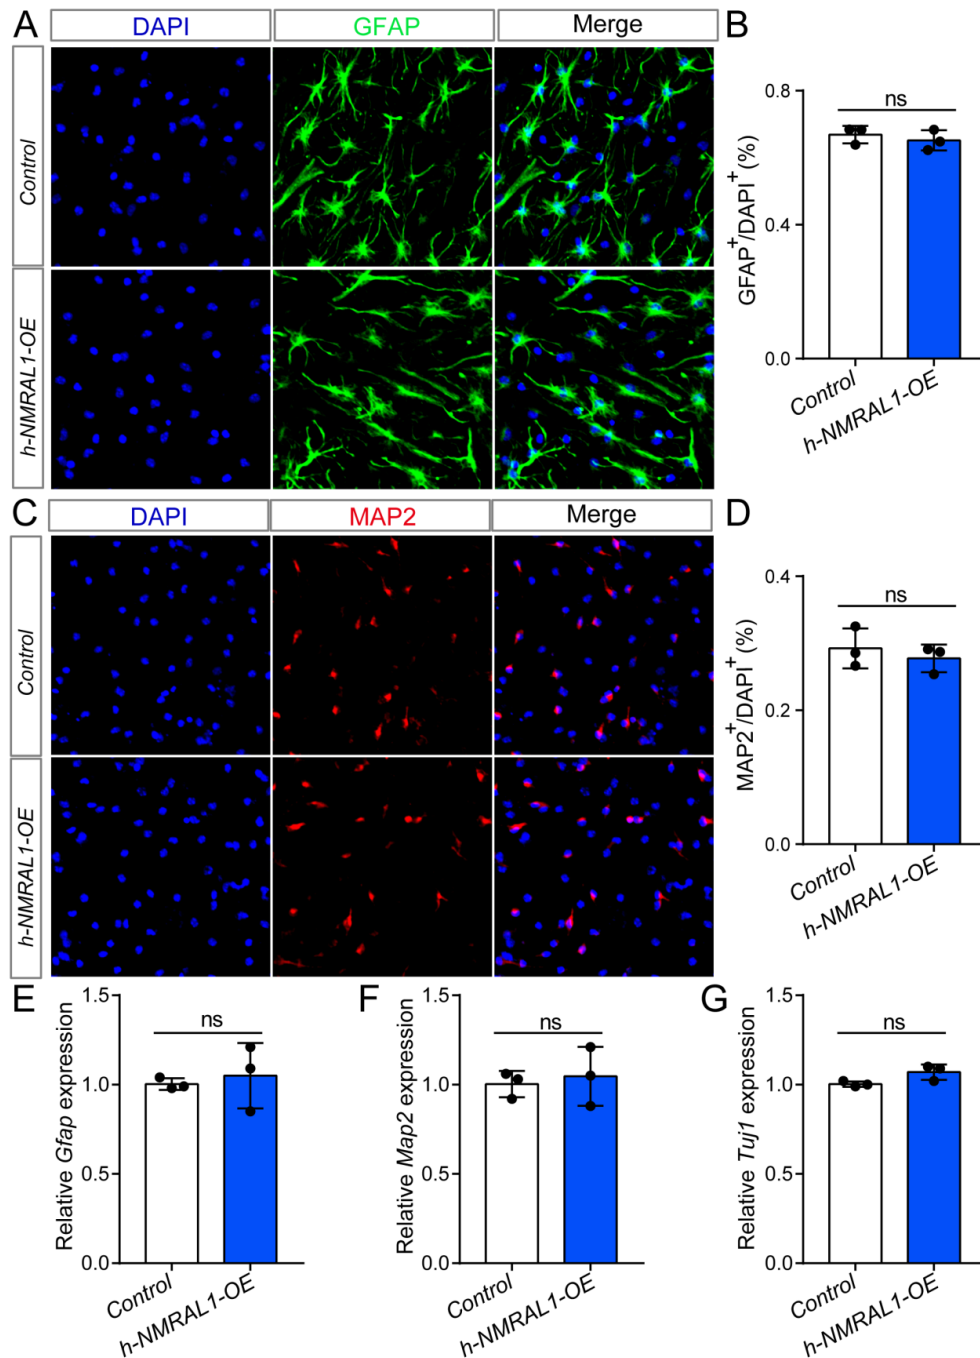

**Supplementary Figure 16. *NMRAL1* overexpression did not affect differentiation of mNSCs.** (A) Representative immunofluorescence staining images for glia cells differentiated from mNSCs. GFAP positive cells were marked with green and the nuclei were stained with DAPI. (B) Quantification for the proportion of GFAP positive glia cells. (C) Representative immunofluorescence staining images for neurons differentiated from mNSCs. MAP2 positive cells were marked with red and the nuclei were stained with DAPI. (D) Quantification for the proportion of MAP2 positive neurons. (E-G) qPCR showed the relative expression level of *Gfap*, *Map2* and *Tuj1* in control and *NMRAL1* overexpression mNSCs. Unpaired two-tailed *Student's t*-test was used in this study. n = 3. Data are represented as mean  $\pm$  SD. ns, not significant.

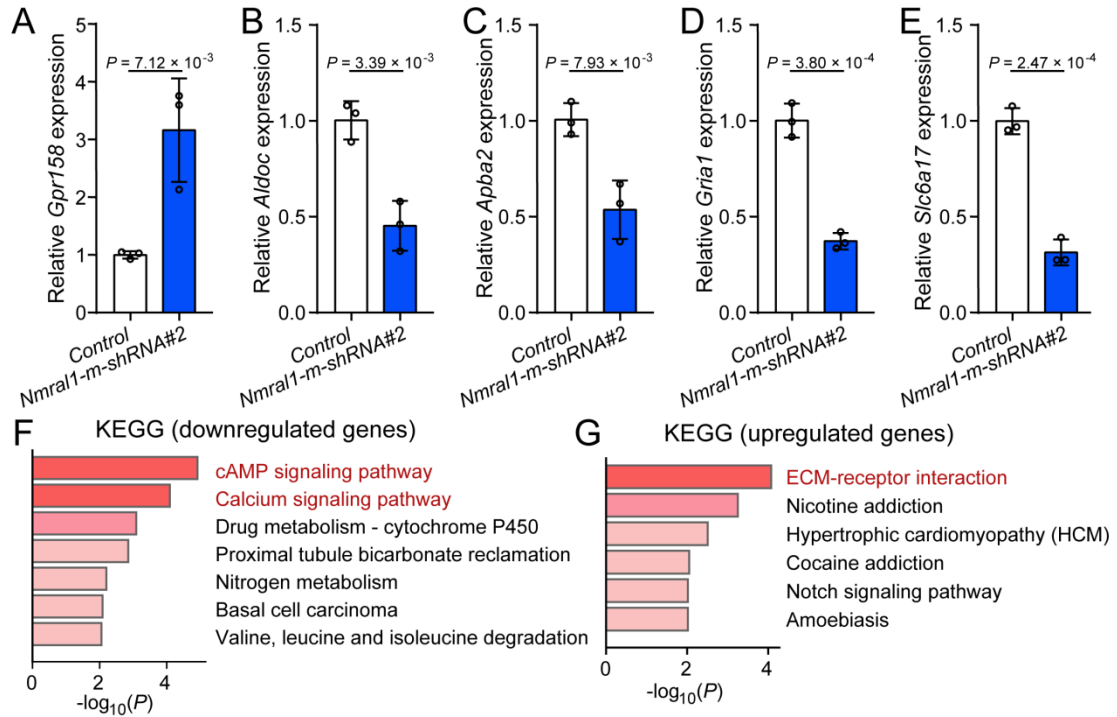

**Supplementary Figure 17. GO and KEGG analyses.** (A-E) The results of qPCR verification.  $P$  values were calculated using two-tailed *Student's t*-test.  $n = 3$  for A-E. (F, G) KEGG analyses of downregulated genes and upregulated genes.

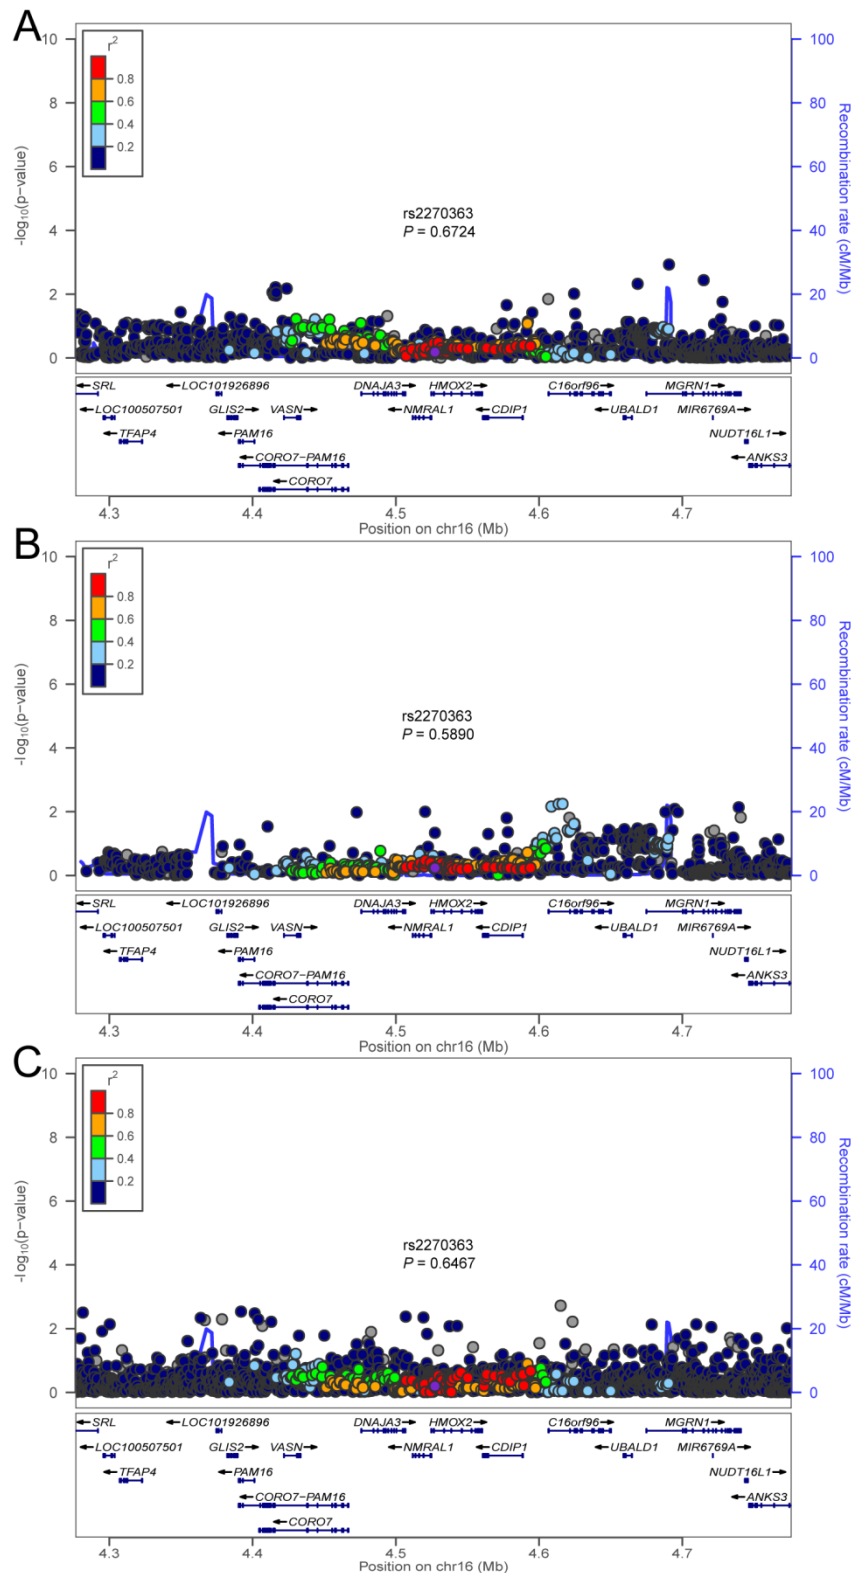

**Supplementary Figure 18.** The Locus zoom plot showing the associations between variants in genomic region (500 kb) containing rs2270363 and ASD,<sup>15</sup> ADHD<sup>16</sup> and BPD.<sup>17</sup> (A) The associations of genetic variants near rs2270363 (500 kb) and ASD.<sup>15</sup> (B) The associations of genetic variants near rs2270363 (500 kb) and ADHD.<sup>16</sup> (C) The associations of genetic variants near rs2270363 (500 kb) and BPD.<sup>17</sup>

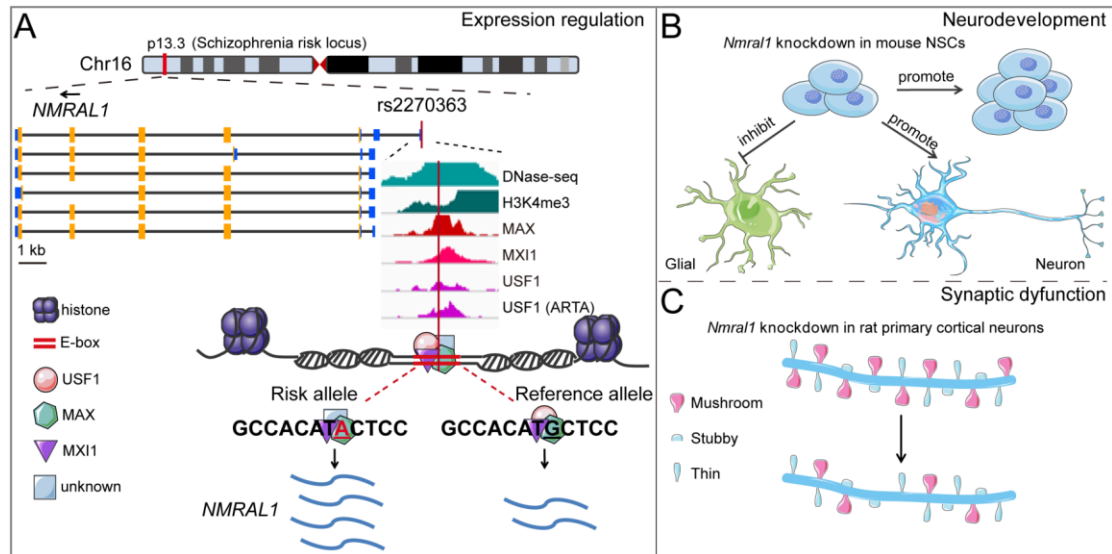

**Supplementary Figure 19. The working model of rs2270363 in schizophrenia pathogenesis.** (A) The molecular regulatory mechanisms of rs2270363. rs2270363 lies in the E-box element of the promoter of *NMRAL1*. rs2270363 regulates *NMRAL1* expression through affecting TFs (USF1, MAX and MXI1) binding and promoter activity. The A allele is associated with higher expression of *NMRAL1*. (B, C) *Nmr1l* affects neurodevelopment and synaptic morphogenesis. *Nmr1l* knockdown affects proliferation and differentiation of mNSCs, and leads to decreased density of mushroom dendritic spines in rat primary cortical neurons.

**Supplementary Table 1. The scoring scheme of the original RegulomeDB rank scores**

| Score | Supporting data                                                             |
|-------|-----------------------------------------------------------------------------|
| 1a    | eQTL + TF binding + matched TF motif + matched DNase Footprint + DNase peak |
| 1b    | eQTL + TF binding + any motif + DNase Footprint + DNase peak                |
| 1c    | eQTL + TF binding + matched TF motif + DNase peak                           |
| 1d    | eQTL + TF binding + any motif + DNase peak                                  |
| 1e    | eQTL + TF binding + matched TF motif                                        |
| 1f    | eQTL + TF binding / DNase peak                                              |
| 2a    | TF binding + matched TF motif + matched DNase Footprint + DNase peak        |
| 2b    | TF binding + any motif + DNase Footprint + DNase peak                       |
| 2c    | TF binding + matched TF motif + DNase peak                                  |
| 3a    | TF binding + any motif + DNase peak                                         |
| 3b    | TF binding + matched TF motif                                               |
| 4     | TF binding + DNase peak                                                     |
| 5     | TF binding or DNase peak                                                    |
| 6     | Motif hit                                                                   |
| 7     | Other                                                                       |

**Supplementary Table 2. The probes used for EMSA**

| Probes            | Sequence (5' to 3')                              |
|-------------------|--------------------------------------------------|
| rs2270363-EMSA-AF | AGACCTGGGGAAAGCCACAT <sup>A</sup> CTCCGCTTCCCGCC |
| rs2270363-EMSA-AR | GGCGGGAAGCGGAG <sup>T</sup> ATGTGGCTTCCCCAGGTCT  |
| rs2270363-EMSA-GF | AGACCTGGGGAAAGCCACAT <sup>G</sup> CTCCGCTTCCCGCC |
| rs2270363-EMSA-GR | GGCGGGAAGCGGAG <sup>C</sup> ATGTGGCTTCCCCAGGTCT  |

The position of rs2270363 was marked with red.

### Supplementary Table 3. shRNAs used for gene knockdown

| sgRNAs and shRNAs                     | Sequence (5' to 3')                                          |
|---------------------------------------|--------------------------------------------------------------|
| sgRNA-F                               | caccGGGGCGGGAAGCGGAGTATG                                     |
| sgRNA-R                               | aaacCATACTCCGCTTCCCGCCCC                                     |
| <i>USF1-shRNA#1-F</i>                 | CCGGGCCGAGACAAGATCAACAACCTCTCGAGAGTTGTTGATCTTGTCTCGGCTTTTTG  |
| <i>USF1-shRNA#1-R</i>                 | AATTCAAAAAGCCGAGACAAGATCAACAACCTCTCGAGAGTTGTTGATCTTGTCTCGGC  |
| <i>USF1-shRNA#2-F</i>                 | CCGGCCACGGATTAGAGGTCGTCATCTCGAGATGACGACCTCTAATCCGTGGTTTTTG   |
| <i>USF1-shRNA#2-R</i>                 | AATTCAAAAACCACGGATTAGAGGTCGTCATCTCGAGATGACGACCTCTAATCCGTGG   |
| <i>MAX-shRNA#1-F</i>                  | CCGGACACACACCAGCAAGATATTGCTCGAGCAATATCTTGCTGGTGTGTGTTTTTTG   |
| <i>MAX-shRNA#1-R</i>                  | AATTCAAAAACACACACCAGCAAGATATTGCTCGAGCAATATCTTGCTGGTGTGTGT    |
| <i>Nmral1-m<sup>a</sup>-shRNA#1-F</i> | CCGGCATTCAAGATTGAGTGGTAACTCGAGTTACCACTCGAATCCTGAATGTTTTTG    |
| <i>Nmral1-m-shRNA#1-R</i>             | AATTCAAAAACATTCAAGATTGAGTGGTAACTCGAGTTACCACTCGAATCCTGAATG    |
| <i>Nmral1-m-shRNA#2-F</i>             | CCGGGCCTTGCTATTTTCGAGAATCTCTCGAGAGATTCTCGAAATAGCAAGGCTTTTTG  |
| <i>Nmral1-m-shRNA#2-R</i>             | AATTCAAAAAGCCTTGCTATTTTCGAGAATCTCTCGAGAGATTCTCGAAATAGCAAGGC  |
| <i>Nmral1-rat-shRNA1-F</i>            | TGCCTCCATTATGTAGTGTATTCAAGAGATACACTACATAATGGAGGCTTTTTTC      |
| <i>Nmral1-rat-shRNA1-R</i>            | TCGAGAAAAAAGCCTCCATTATGTAGTGTATCTCTTGAATACACTACATAATGGAGGCA  |
| <i>Nmral1-rat-shRNA2-F</i>            | TGCCTTGCTATTTTCGAGAACTTCAAGAGAGTTCTCGAAATAGCAAGGCTTTTTTC     |
| <i>Nmral1-rat-shRNA2-R</i>            | TCGAGAAAAAAGCCTTGCTATTTTCGAGAACTCTCTTGAAGTTCTCGAAATAGCAAGGCA |

<sup>a</sup>This shRNA targeting *Nmral1* for mouse.

### Supplementary Table 4. Primers used for *NMRAL1* overexpression

| Primers              | Sequence (5' to 3')                                           |
|----------------------|---------------------------------------------------------------|
| <i>h-NMRAL1-OE-F</i> | ctcatctttggcaaagaattcATGGTGGACAAGAACTGG                       |
| <i>h-NMRAL1-OE-R</i> | ctctagagtcgcgccgcTCACTTATCGTCGTCATCCTTGTAATCCAGCAGGTTGAAGTCCC |



## Supplementary Table 5. Primers used for qPCR

| Primers                     | Sequence (5' to 3')     |
|-----------------------------|-------------------------|
| <i>USF1</i> -QPCR-F         | CTGCTGTTGTTACTACCCAGG   |
| <i>USF1</i> -QPCR-R         | TCTGACTTCGGGGAATAAGGG   |
| <i>MAX</i> -QPCR-F          | GAGGTGGAGAGCGACGAAGA    |
| <i>MAX</i> -QPCR-R          | CTGTCTTTGATGTGGTCCCTACG |
| <i>CORO7</i> -human-QPCR-F  | GCTGCCATTCAGACCTAGTCA   |
| <i>CORO7</i> -human-QPCR-R  | AGTCGCCAGAGTTTTACCGTC   |
| <i>HMOX2</i> -human-QPCR-F  | TCAGCGGAAGTGGAAACCTC    |
| <i>HMOX2</i> -human-QPCR-R  | AGAAGTCCTTGACAAACTGGGT  |
| <i>DNAJA3</i> -human-QPCR-F | TTTGGCGAGTTCTCATCTCT    |
| <i>DNAJA3</i> -human-QPCR-R | TTGCAGCTTGATTGAATGTCAAC |
| <i>CDIP1</i> -human-QPCR-F  | ATGTGATCTGGGCTGCTGC     |
| <i>CDIP1</i> -human-QPCR-R  | GCGCTTGACGTGTAGATGTAGG  |
| <i>NMRAL1</i> -human-QPCR-F | AAATACGTCCGCCAGAACATC   |
| <i>NMRAL1</i> -human-QPCR-R | AGCTTTTCGTAGTCCTCAGGAG  |
| <i>Nmral1</i> -mouse-QPCR-F | GGCCCGTGCATTGCTAGAA     |
| <i>Nmral1</i> -mouse-QPCR-R | CGTCTCCCAGTAATTGGTCAC   |
| <i>Nmral1</i> -rat-QPCR-F   | CGACTGCCTTGCTATTTTCCA   |
| <i>Nmral1</i> -rat-QPCR-R   | GTCACTCACAGACATTCCATCCA |
| <i>ACTB</i> -qPCR-F         | CATGTACGTTGCTATCCAGGC   |
| <i>ACTB</i> -qPCR-R         | CTCCTTAATGTCACGCACGAT   |
| <i>Actb</i> -qPCR-F         | GGCTGTATTCCCCTCCATCG    |
| <i>Actb</i> -qPCR-R         | CCAGTTGGTAACAATGCCATGT  |
| <i>Gfap</i> -qPCR-F         | CGGAGACGCATCACCTCTG     |
| <i>Gfap</i> -qPCR-R         | AGGGAGTGGAGGAGTCATTTCG  |
| <i>Map2</i> -qPCR-F         | GCCAGCCTCAGAACAAACA     |
| <i>Map2</i> -qPCR-R         | GCTCAGCGAATGAGGAAGGA    |
| <i>Tuj1</i> -qPCR-F         | TAGACCCCAGCGGCAACTAT    |
| <i>Tuj1</i> -qPCR-R         | GTTCCAGGTTCCAAGTCCACC   |
| <i>Gpr158</i> -qPCR-F       | GGAAAGTCACCGTCCCTA      |
| <i>Gpr158</i> -qPCR-R       | GAAGTTGGTGGCGTGT        |
| <i>Apba2</i> -qPCR-F        | TCACCTACTACATCCGCTAC    |
| <i>Apba2</i> -qPCR-R        | CTCCTGACACTCATCGGT      |
| <i>Aldoc</i> -qPCR-F        | GTCAGAGTGAAGAGGAGGCT    |
| <i>Aldoc</i> -qPCR-R        | CAGCATTATCCCTTTGTCTT    |
| <i>Slc6a17</i> -qPCR-F      | CGGAAACTACTTTGTCACCAT   |
| <i>Slc6a17</i> -qPCR-R      | GATGTTCTCAAGGATGACGAT   |
| <i>Grial1</i> -qPCR-F       | ACATCGTCACGACTATCCTCGA  |
| <i>Grial1</i> -qPCR-R       | AGTAGCCCTCATAGCGGTCATT  |

**Supplementary Table 6. SNPs locations and RegulomeDB annotation**

| CHR   | BP        | SNP ID     | the RegulomeDB score |
|-------|-----------|------------|----------------------|
| chr16 | 4526292   | rs2270363  | 1f                   |
| chr22 | 42486723  | rs1801311  | 1f                   |
| chr22 | 42475703  | rs2269524  | 1f                   |
| chr4  | 103749516 | rs223387   | 1f                   |
| chr5  | 140187322 | rs3822346  | 1f                   |
| chr2  | 73461553  | rs41285977 | 2a                   |
| chr2  | 110371692 | rs7579996  | 2a                   |
| chr22 | 50311973  | rs9616378  | 2a                   |
| chr15 | 85114447  | rs12912934 | 2b                   |
| chr15 | 89878391  | rs2856268  | 2b                   |
| chr1  | 243419429 | rs3904682  | 2b                   |
| chr8  | 144815612 | rs7012106  | 2b                   |
| chr22 | 42475568  | rs8135801  | 2b                   |
| chr14 | 104314183 | rs10083367 | 3a                   |
| chr14 | 104314182 | rs10083370 | 3a                   |
| chr1  | 8484228   | rs159961   | 4                    |
| chr4  | 103748797 | rs223390   | 4                    |
| chr19 | 50169020  | rs2304204  | 4                    |
| chr3  | 50340996  | rs28365992 | 4                    |
| chr12 | 123849921 | rs28594416 | 4                    |
| chr3  | 180630191 | rs34455584 | 4                    |
| chr4  | 170540857 | rs3797040  | 4                    |
| chr11 | 82996986  | rs494791   | 4                    |
| chr12 | 123849272 | rs60754073 | 4                    |
| chr15 | 40583560  | rs62021888 | 4                    |
| chr12 | 123752637 | rs76514049 | 4                    |
| chr5  | 140027216 | rs778593   | 4                    |
| chr2  | 200716119 | rs796364   | 4                    |
| chr6  | 87861585  | rs9362397  | 4                    |
| chr22 | 50312979  | rs9616382  | 4                    |
| chr1  | 150039678 | rs2027349  | 1b                   |
| chr3  | 52833219  | rs2535629  | 1b                   |
| chr8  | 8168413   | rs7014953  | 1b                   |
| chr22 | 50297435  | rs1321     | 1f                   |
| chr19 | 19611550  | rs3794993  | 1f                   |
| chr16 | 30017895  | rs3814880  | 1f                   |
| chr16 | 4506232   | rs4786494  | 1f                   |
| chr15 | 85177297  | rs10795    | 2a                   |
| chr1  | 205110946 | rs12136320 | 2a                   |
| chr17 | 17997547  | rs2974999  | 2a                   |
| chr4  | 103605916 | rs393223   | 2a                   |

| <b>CHR</b> | <b>BP</b> | <b>SNP ID</b> | <b>the RegulomeDB score</b> |
|------------|-----------|---------------|-----------------------------|
| chr12      | 123722833 | rs78866909    | 2a                          |
| chr10      | 104387735 | rs10786700    | 2b                          |
| chr16      | 68418792  | rs11861362    | 2b                          |
| chr8       | 10009949  | rs11986122    | 2b                          |
| chr8       | 10009952  | rs11993089    | 2b                          |
| chr3       | 180630565 | rs1805579     | 2b                          |
| chr19      | 50168871  | rs2304206     | 2b                          |
| chr2       | 233792109 | rs2675960     | 2b                          |
| chr1       | 8468278   | rs301792      | 2b                          |
| chr1       | 214163069 | rs340836      | 2b                          |
| chr16      | 89699664  | rs4785581     | 2b                          |
| chr22      | 50317187  | rs7410601     | 2b                          |
| chr22      | 42567090  | rs9306356     | 2b                          |
| chr6       | 143646783 | rs9373388     | 2b                          |
| chr8       | 89566903  | rs1352318     | 2c                          |
| chr22      | 50178917  | rs138833      | 2c                          |
| chr10      | 104928914 | rs12416331    | 3a                          |
| chr4       | 103974122 | rs13113099    | 3a                          |
| chr2       | 200787719 | rs281759      | 3a                          |
| chr15      | 78894759  | rs3743078     | 3a                          |
| chr1       | 150130096 | rs78681982    | 3a                          |
| chr5       | 101769984 | rs10038801    | 4                           |
| chr17      | 2143460   | rs10852932    | 4                           |
| chr11      | 83048096  | rs11233566    | 4                           |
| chr6       | 96464060  | rs117178087   | 4                           |
| chr1       | 205035455 | rs16937       | 4                           |
| chr2       | 220049128 | rs2385395     | 4                           |
| chr2       | 208481637 | rs2551945     | 4                           |
| chr7       | 24595020  | rs2711116     | 4                           |
| chr22      | 42527471  | rs28633410    | 4                           |
| chr6       | 28779878  | rs3131340     | 4                           |
| chr3       | 53270344  | rs3773744     | 4                           |
| chr3       | 53270424  | rs3773745     | 4                           |
| chr6       | 143658860 | rs3804536     | 4                           |
| chr6       | 108944165 | rs3813498     | 4                           |
| chr12      | 123743436 | rs4759413     | 4                           |
| chr8       | 8639740   | rs486781      | 4                           |
| chr17      | 17897739  | rs4924832     | 4                           |
| chr15      | 89902032  | rs4932217     | 4                           |
| chr22      | 42380001  | rs5751195     | 4                           |
| chr22      | 42511002  | rs6002621     | 4                           |
| chr17      | 20170608  | rs61660810    | 4                           |
| chr3       | 53376669  | rs6795127     | 4                           |

| <b>CHR</b> | <b>BP</b> | <b>SNP ID</b> | <b>the RegulomeDB score</b> |
|------------|-----------|---------------|-----------------------------|
| chr5       | 153688215 | rs6871683     | 4                           |
| chr8       | 8168222   | rs6992091     | 4                           |
| chr1       | 150135291 | rs72694957    | 4                           |
| chr15      | 84915246  | rs72748702    | 4                           |
| chr12      | 110662327 | rs7304243     | 4                           |
| chr17      | 19912679  | rs78532287    | 4                           |
| chr5       | 127149861 | rs790475      | 4                           |
| chr5       | 137775581 | rs982085      | 4                           |
| chr5       | 49636753  | rs10940235    | 5                           |
| chr5       | 153498135 | rs58848914    | 5                           |
| chr8       | 89516441  | rs716881      | 5                           |
| chr22      | 50278642  | rs910800      | 5                           |
| chr8       | 9573154   | rs12114661    | 7                           |

The bold font indicates the 30 SNPs located in promoter regions and marked with H3K4me3 in UCSC genome browser (<http://genome.ucsc.edu/>). The red font indicate the 5 prioritized high-confidence (RegulomeDB rank score < 2) functional SNPs in the promoter region. Data were from RegulomeDB (<https://www.regulomedb.org/>).<sup>7</sup>

**Supplementary Table 7. The eQTL genes of the 5 prioritized SNPs**

| SNP         | Gene Symbol            | P-value (CMC) | FDR ( $\leq 0.05$ , CMC) | P-value (LIBD) | FDR ( $\leq 0.05$ , LIBD) |
|-------------|------------------------|---------------|--------------------------|----------------|---------------------------|
| rs2270363   | <i>CDIP1</i>           | 3.05E-07      | 4.40E-05                 | 1.43E-05       | 1.11E-03                  |
|             | <i>CORO7</i>           | 2.06E-10      | 5.06E-08                 | 1.72E-17       | 7.46E-15                  |
|             | <i>DNAJA3</i>          | 8.22E-31      | 1.17E-27                 | 2.21E-06       | 2.09E-04                  |
|             | <i>NMRAL1</i>          | 1.62E-10      | 4.05E-08                 | 4.88E-16       | 1.87E-13                  |
| rs2269524   | <i>CYP2D7P</i>         | NA            | NA                       | 8.48E-09       | 1.29E-06                  |
|             | <i>FAM109B</i>         | 1.02E-06      | 9.73E-05                 | 7.35E-16       | 2.77E-13                  |
|             | <i>LINC00634</i>       | 2.33E-08      | 3.01E-06                 | 1.01E-09       | 1.78E-07                  |
|             | <i>NAGA</i>            | 5.33E-18      | 2.03E-15                 | 1.04E-26       | 8.81E-24                  |
|             | <i>RP1-257I20.14</i>   | NA            | NA                       | 3.98E-05       | 2.71E-03                  |
|             | <i>RP4-669P10.16</i>   | NA            | NA                       | 2.93E-22       | 1.86E-19                  |
|             | <i>SMDT1</i>           | NA            | NA                       | 3.91E-06       | 3.49E-04                  |
|             | <i>WBP2NL</i>          | 3.63E-06      | 3.09E-04                 | NA             | NA                        |
| rs1801311   | <i>CYP2D7P</i>         | NA            | NA                       | 4.17E-12       | 1.03E-09                  |
|             | <i>FAM109B</i>         | 1.46E-06      | 1.34E-04                 | 6.23E-17       | 2.58E-14                  |
|             | <i>LINC00634</i>       | 2.40E-08      | 3.08E-06                 | 1.90E-08       | 2.73E-06                  |
|             | <i>NAGA</i>            | 4.06E-17      | 1.43E-14                 | 4.45E-29       | 4.42E-26                  |
|             | <i>RP1-257I20.14</i>   | NA            | NA                       | 7.28E-06       | 6.07E-04                  |
|             | <i>RP4-669P10.16</i>   | NA            | NA                       | 3.51E-23       | 2.37E-20                  |
|             | <i>WBP2NL</i>          | 6.62E-06      | 5.33E-04                 | NA             | NA                        |
| rs223387    | <i>BDH2</i>            | 5.69E-07      | 3.98E-05                 | NA             | NA                        |
|             | <i>CENPE</i>           | 1.21E-03      | 3.76E-02                 | NA             | NA                        |
|             | <i>CISD2</i>           | 6.80E-04      | 2.35E-02                 | NA             | NA                        |
|             | <i>KRT8P46</i>         | 2.32E-14      | 4.62E-12                 | NA             | NA                        |
|             | <i>LRRC37A15P</i>      | 2.84E-13      | 4.96E-11                 | NA             | NA                        |
|             | <i>SLC9B1</i>          | 2.29E-35      | 1.51E-32                 | NA             | NA                        |
| rs3822346   | <i>ANKHD1-EIF4EBP3</i> | 2.02E-04      | 9.40E-03                 | NA             | NA                        |
|             | <i>CD14</i>            | NA            | NA                       | 1.53E-04       | 8.55E-03                  |
|             | <i>IK</i>              | 8.96E-04      | 3.20E-02                 | 3.49E-05       | 2.41E-03                  |
|             | <i>NDUFA2</i>          | 3.14E-05      | 1.88E-03                 | NA             | NA                        |
|             | <i>PCDHA1</i>          | NA            | NA                       | 2.62E-07       | 3.03E-05                  |
|             | <i>PCDHA10</i>         | 1.96E-14      | 4.50E-12                 | 1.30E-13       | 3.86E-11                  |
|             | <i>PCDHA13</i>         | 3.90E-19      | 1.49E-16                 | 3.21E-14       | 1.02E-11                  |
|             | <i>PCDHA2</i>          | 3.69E-08      | 3.96E-06                 | 3.95E-06       | 3.53E-04                  |
|             | <i>PCDHA7</i>          | 9.78E-20      | 4.04E-17                 | 1.30E-14       | 4.29E-12                  |
|             | <i>PCDHA8</i>          | 2.43E-18      | 8.29E-16                 | 5.03E-32       | 5.90E-29                  |
|             | <i>PCDHA9</i>          | NA            | NA                       | 6.19E-18       | 2.80E-15                  |
|             | <i>PCDHAC2</i>         | 5.85E-04      | 2.26E-02                 | NA             | NA                        |
|             | <i>PCDHB3</i>          | 1.69E-04      | 8.13E-03                 | NA             | NA                        |
|             | <i>PCDHB9</i>          | 8.28E-04      | 3.00E-02                 | NA             | NA                        |
| <i>SRA1</i> | 2.53E-07               | 2.34E-05      | NA                       | NA             |                           |

| SNP       | Gene Symbol  | P-value (CMC) | FDR ( $\leq 0.05$ , CMC) | P-value (LIBD) | FDR ( $\leq 0.05$ , LIBD) |
|-----------|--------------|---------------|--------------------------|----------------|---------------------------|
|           | <i>TMCO6</i> | NA            | NA                       | 8.82E-05       | 5.37E-03                  |
| rs3822346 | <i>WDR55</i> | 9.48E-04      | 3.35E-02                 | NA             | NA                        |
|           | <i>ZMAT2</i> | 1.30E-10      | 2.00E-08                 | 1.10E-08       | 1.65E-06                  |

Data were from CMC (N = 467) and LIBD (N = 412) brain eQTL datasets.<sup>8, 11</sup>

**Supplementary Table 8. Differential expression analysis of the eQTL genes of the 5 selected functional SNPs**

| SNP           | Gene_symbol             | logFC         | P-value         | FDR             |
|---------------|-------------------------|---------------|-----------------|-----------------|
| rs2270363     | <i>CDIP1</i>            | -0.026        | 4.47E-01        | 6.92E-01        |
|               | <b><i>CORO7</i></b>     | <b>-0.086</b> | <b>2.46E-02</b> | <b>1.65E-01</b> |
|               | <i>DNAJA3</i>           | -0.010        | 6.41E-01        | 8.25E-01        |
|               | <b><i>NMRALI</i></b>    | <b>-0.104</b> | <b>3.98E-03</b> | <b>7.18E-02</b> |
| rs2269524     | <i>CYP2D7P</i>          | NA            | NA              | NA              |
|               | <b><i>FAM109B</i></b>   | <b>-0.108</b> | <b>2.20E-02</b> | <b>1.57E-01</b> |
|               | <b><i>LINC00634</i></b> | <b>-0.172</b> | <b>3.43E-04</b> | <b>2.43E-02</b> |
|               | <i>NAGA</i>             | 0.015         | 6.76E-01        | 8.44E-01        |
|               | <i>RP1-257I20.14</i>    | NA            | NA              | NA              |
|               | <i>RP4-669P10.16</i>    | NA            | NA              | NA              |
|               | <i>SMDT1</i>            | NA            | NA              | NA              |
| rs1801311     | <i>CYP2D7P</i>          | NA            | NA              | NA              |
|               | <b><i>FAM109B</i></b>   | <b>-0.108</b> | <b>2.20E-02</b> | <b>1.57E-01</b> |
|               | <b><i>LINC00634</i></b> | <b>-0.172</b> | <b>3.43E-04</b> | <b>2.43E-02</b> |
|               | <i>NAGA</i>             | 0.015         | 6.76E-01        | 8.44E-01        |
|               | <i>RP1-257I20.14</i>    | NA            | NA              | NA              |
|               | <i>RP4-669P10.16</i>    | NA            | NA              | NA              |
|               | <i>WBP2NL</i>           | 0.036         | 4.21E-01        | 6.73E-01        |
| rs223387      | <i>BDH2</i>             | -0.033        | 3.63E-01        | 6.24E-01        |
|               | <i>CENPE</i>            | 0.069         | 9.58E-02        | 3.22E-01        |
|               | <i>CISD2</i>            | -0.006        | 8.44E-01        | 9.28E-01        |
|               | <i>KRT8P46</i>          | 0.027         | 4.89E-01        | 7.23E-01        |
|               | <i>LRRC37A15P</i>       | 0.013         | 7.38E-01        | 8.73E-01        |
|               | <i>SLC9B1</i>           | -0.041        | 3.60E-01        | 6.21E-01        |
| rs3822346     | <i>ANKHD1-EIF4EBP3</i>  | 0.077         | 5.23E-02        | 2.41E-01        |
|               | <i>CD14</i>             | 0.031         | 7.63E-01        | 8.86E-01        |
|               | <i>IK</i>               | -0.014        | 6.79E-01        | 8.45E-01        |
|               | <b><i>NDUFA2</i></b>    | <b>-0.124</b> | <b>1.48E-02</b> | <b>1.32E-01</b> |
|               | <i>PCDHA1</i>           | -0.020        | 6.39E-01        | 8.24E-01        |
|               | <i>PCDHA10</i>          | -0.034        | 6.98E-01        | 8.55E-01        |
|               | <i>PCDHA13</i>          | -0.074        | 8.43E-02        | 3.04E-01        |
|               | <i>PCDHA2</i>           | 0.039         | 3.16E-01        | 5.84E-01        |
|               | <i>PCDHA7</i>           | 0.093         | 7.48E-02        | 2.88E-01        |
|               | <i>PCDHA8</i>           | 0.006         | 9.03E-01        | 9.57E-01        |
|               | <i>PCDHA9</i>           | -0.003        | 9.69E-01        | 9.86E-01        |
|               | <i>PCDHAC2</i>          | 0.026         | 4.05E-01        | 6.61E-01        |
|               | <i>PCDHB3</i>           | 0.009         | 8.00E-01        | 9.05E-01        |
| <i>PCDHB9</i> | 0.017                   | 6.54E-01      | 8.32E-01        |                 |
|               | <b><i>SRAI</i></b>      | <b>-0.059</b> | <b>1.85E-02</b> | <b>1.46E-01</b> |

| SNP       | Gene_symbol  | logFC  | P-value  | FDR      |
|-----------|--------------|--------|----------|----------|
| rs3822346 | <i>TMCO6</i> | -0.026 | 3.69E-01 | 6.29E-01 |
|           | <i>WDR55</i> | -0.016 | 4.48E-01 | 6.93E-01 |
|           | <i>ZMAT2</i> | -0.069 | 1.08E-01 | 3.40E-01 |

<sup>a</sup>The eQTL genes of 5 SNPs were obtained from CMC and LIBD, (FDR  $\leq$  0.05). The bold font represents the genes down-regulated in SZ cases compared with controls.

**Supplementary Table 9. rs2269524 is in high linkage disequilibrium with rs1801311 in different populations**

| Population                                                 | Focus Variant | Variant 2 | r <sup>2</sup> | D' |
|------------------------------------------------------------|---------------|-----------|----------------|----|
| Bengali in Bangladesh                                      | rs2269524     | rs1801311 | 0.97           | 1  |
| Chinese Dai in Xishuangbanna, China                        | rs2269524     | rs1801311 | 0.95           | 1  |
| Utah residents with Northern and Western European ancestry | rs2269524     | rs1801311 | 0.98           | 1  |
| Han Chinese in Beijing, China                              | rs2269524     | rs1801311 | 0.97           | 1  |
| Southern Han Chinese, China                                | rs2269524     | rs1801311 | 1.00           | 1  |
| Finnish in Finland                                         | rs2269524     | rs1801311 | 1.00           | 1  |
| British in England and Scotland                            | rs2269524     | rs1801311 | 1.00           | 1  |
| Gujarati Indian in Houston, TX                             | rs2269524     | rs1801311 | 1.00           | 1  |
| Iberian populations in Spain                               | rs2269524     | rs1801311 | 0.98           | 1  |
| Indian Telugu in the UK                                    | rs2269524     | rs1801311 | 0.98           | 1  |
| Japanese in Tokyo, Japan                                   | rs2269524     | rs1801311 | 1.00           | 1  |
| Kinh in Ho Chi Minh City, Vietnam                          | rs2269524     | rs1801311 | 0.96           | 1  |
| Mexican Ancestry in Los Angeles, California                | rs2269524     | rs1801311 | 1.00           | 1  |
| Peruvian in Lima, Peru                                     | rs2269524     | rs1801311 | 1.00           | 1  |
| Punjabi in Lahore, Pakistan                                | rs2269524     | rs1801311 | 1.00           | 1  |
| Sri Lankan Tamil in the UK                                 | rs2269524     | rs1801311 | 0.98           | 1  |
| Toscani in Italy                                           | rs2269524     | rs1801311 | 0.98           | 1  |

r<sup>2</sup> indicates the linkage disequilibrium value between these two SNPs. Data were from Ensembl.



**Supplementary Table 10. Genotypic frequency of rs2270363 in tissue samples (258 cases, 279 controls) used for differential expression analysis (CMC).**

| Genotype | Samples  |          | Genotypic frequency |          |
|----------|----------|----------|---------------------|----------|
|          | SZ cases | Controls | SZ cases            | Controls |
| AA       | 15       | 24       | 0.0586              | 0.0860   |
| AG       | 103      | 91       | 0.4023              | 0.3262   |
| GG       | 138      | 164      | 0.5391              | 0.5878   |

Data were from CMC.<sup>8</sup> Two cases have no genotype data.

**Supplementary Table 11. Primers used for SNaPShot genotyping**

| Primers                   | Sequence (5' to 3')              |
|---------------------------|----------------------------------|
| rs2270363-F-252           | AGTGTTCTGCGAAGCAC                |
| rs2270363-R-252           | CAGCCTCCAGTCAGCGTG               |
| Ex-rs2270363 <sup>a</sup> | TTTTTTTTTT AGACCTGGGG AAAGCCACAT |

<sup>a</sup>The extension primers were used for genotype.

**Supplementary Table 12. Primers used for dual-luciferase reporter gene assays**

| Primers                          | Sequence (5' to 3')                                   |
|----------------------------------|-------------------------------------------------------|
| rs2270363-F1-861-wt <sup>a</sup> | CCAGAACATTTCTCTATCGATAGGTACCCCTATAGAGATAAGGGCATTAGAGG |
| rs2270363-R1-861-wt <sup>a</sup> | ACTTAGATCGCAGATCTCGAGGTGGATGTACAAGGATTAACCAC          |
| rs2270363-F2-861-wt              | GGCCTAACTGGCCGGTACCGTGGATGTACAAGGATTAACCAC            |
| rs2270363-R2-861-wt              | ACAGTACCGGATTGCCAAGCTTCTCTATAGAGATAAGGGCATTAGAGG      |
| rs2270363-F-861-mut <sup>b</sup> | GCCACAT G CTCCGCTTCCCGCCCC                            |
| rs2270363-R-861-mut <sup>b</sup> | AGCGGAG C ATGTGGCTTTCCCCAGGTCT                        |

<sup>a</sup>This pair of primers were used to amplify the DNA fragments containing rs2270363.

<sup>b</sup>This pair of primers were used for PCR-mediated site mutation.

## References

1. Li YF, Ma CG, Li WQ, Yang YF, Li XY, Liu JW *et al.* A missense variant in NDUFA6 confers schizophrenia risk by affecting YY1 binding and NAGA expression. *Mol Psychiatr* 2021; DOI: 10.1038/s41380-41021-01125-x.
2. Wang JY, Li XY, Li HJ, Liu JW, Yao YG, Li M *et al.* Integrative analyses followed by functional characterization reveal TMEM180 as a schizophrenia risk gene. *Schizophrenia bulletin* 2021; DOI: 10.1093/schbul/sbab1032.
3. Love MI, Huber W, Anders S. Moderated estimation of fold change and dispersion for RNA-seq data with DESeq2. *Genome Biol* 2014; **15**(12): 550.
4. Zhou YY, Zhou B, Pache L, Chang M, Khodabakhshi AH, Tanaseichuk O *et al.* Metascape provides a biologist-oriented resource for the analysis of systems-level datasets. *Nat Commun* 2019; **10**: 1523.
5. Lam M, Chen CY, Li ZQ, Martin AR, Bryois J, Ma XX *et al.* Comparative genetic architectures of schizophrenia in East Asian and European populations. *Nat Genet* 2019; **51**(12): 1670-1678.
6. Huo YX, Li SW, Liu JW, Li XY, Luo XJ. Functional genomics reveal gene regulatory mechanisms underlying schizophrenia risk. *Nat Commun* 2019; **10**: 670.
7. Boyle AP, Hong EL, Hariharan M, Cheng Y, Schaub MA, Kasowski M *et al.* Annotation of functional variation in personal genomes using RegulomeDB. *Genome Res* 2012; **22**(9): 1790-1797.
8. Fromer M, Roussos P, Sieberts SK, Johnson JS, Kavanagh DH, Perumal TM *et al.* Gene expression elucidates functional impact of polygenic risk for schizophrenia. *Nat Neurosci* 2016; **19**(11): 1442-1453.
9. Nott A, Holtman IR, Coufal NG, Schlachetzki JCM, Yu M, Hu R *et al.* Brain cell type-specific enhancer-promoter interactome maps and disease-risk association. *Science* 2019; **366**(6469): 1134-1139.
10. Davis CA, Hitz BC, Sloan CA, Chan ET, Davidson JM, Gabdank I *et al.* The Encyclopedia of DNA elements (ENCODE): data portal update. *Nucleic Acids Res* 2018; **46**(D1): D794-D801.
11. Jaffe AE, Straub RE, Shin JH, Tao R, Gao Y, Collado-Torres L *et al.* Developmental and genetic regulation of the human cortex transcriptome illuminate schizophrenia pathogenesis. *Nat Neurosci* 2018; **21**(8): 1117-1125.
12. Ardlie KG, DeLuca DS, Segre AV, Sullivan TJ, Young TR, Gelfand ET *et al.* The Genotype-Tissue Expression (GTEx) pilot analysis: Multitissue gene regulation in humans. *Science* 2015; **348**(6235): 648-660.
13. Persson A, Hober S, Uhlen M. A human protein atlas based on antibody proteomics. *Curr Opin Mol Ther* 2006; **8**(3): 185-190.
14. Wu Y, Li XY, Liu JW, Luo XJ, Yao YG. SZDB2.0: an updated comprehensive resource for schizophrenia research. *Hum Genet* 2020; **139**(10): 1285-1297.
15. Grove J, Ripke S, Als TD, Mattheisen M, Walters RK, Won H *et al.* Identification of common genetic risk variants for autism spectrum disorder. *Nat Genet* 2019; **51**(3): 431-444.
16. Demontis D, Walters RK, Martin J, Mattheisen M, Als TD, Agerbo E *et al.* Discovery of the first genome-wide significant risk loci for attention deficit/hyperactivity disorder. *Nat Genet* 2019; **51**(1): 63-75.
17. Stahl EA, Breen G, Forstner AJ, McQuillin A, Ripke S, Trubetskoy V *et al.* Genome-wide association study identifies 30 loci associated with bipolar disorder. *Nat Genet* 2019; **51**(5): 793-803.

### The unmodified EMSA blots

|                      |   |   |   |   |   |   |    |    |
|----------------------|---|---|---|---|---|---|----|----|
| Nuclear extract (µg) | 0 | 0 | 4 | 4 | 8 | 8 | 12 | 12 |
| rs2270363 A allele   | + | - | + | - | + | - | +  | -  |
| rs2270363 G allele   | - | + | - | + | - | + | -  | +  |

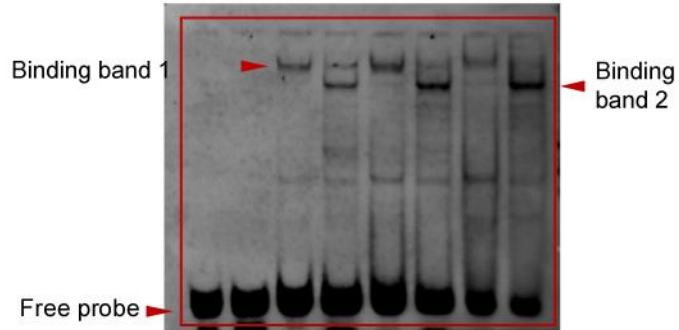

### Original EMSA blots of Fig. 1I

|                          |   |    |    |    |     |
|--------------------------|---|----|----|----|-----|
| Nuclear extract (µg)     | 0 | 12 | 12 | 12 | 12  |
| rs2270363 G allele       | + | +  | +  | +  | +   |
| Unlabeled probe G allele | - | -  | +  | -  | -   |
| Unlabeled probe A allele | - | -  | -  | +  | -   |
| USF1 antibody (µg)       | - | -  | -  | -  | 0.6 |

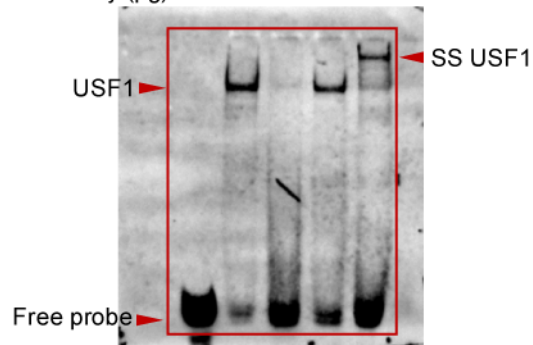

### Original EMSA blots of Fig. 1J

The unmodified blots of Western-blot  
NMRAL1-1×FLAG and  $\beta$ -actin protein expression in  
mouse NSCs

NMRAL1-1×FLAG

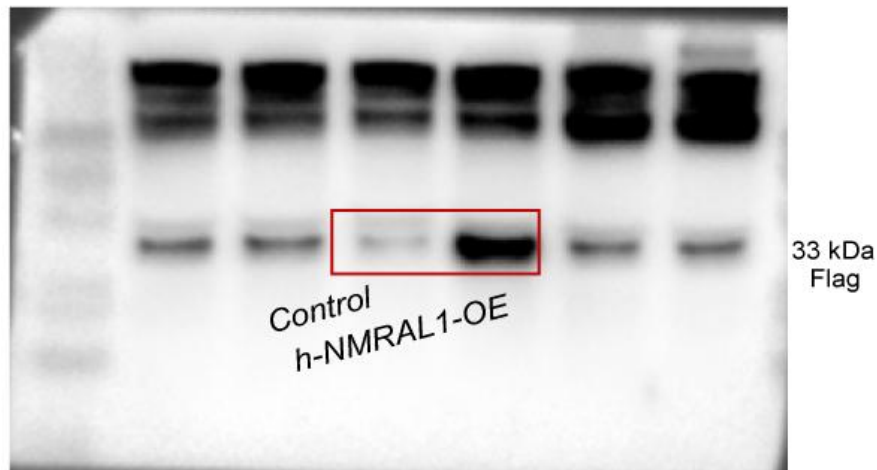

$\beta$ -actin

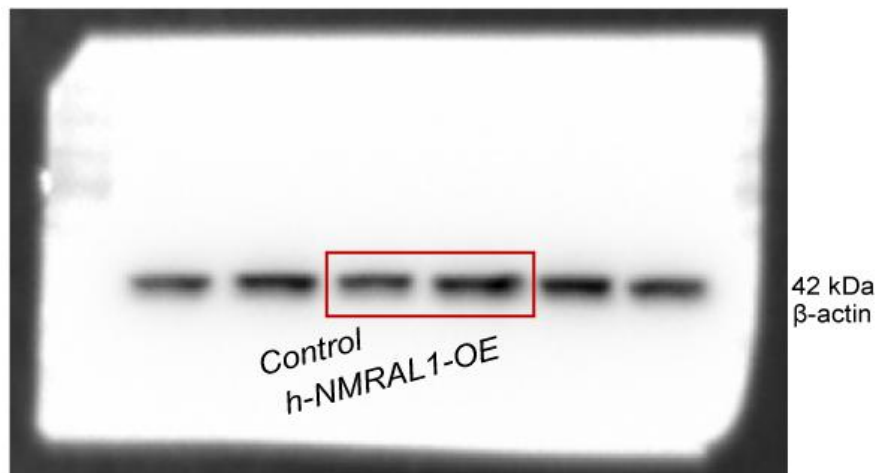

Original blots of Supplementary Fig. 15A

## The unmodified gels of RT-PCR

### *NMRAL1* and *Actb* mRNA expression in mouse NSCs

#### *NMRAL1*

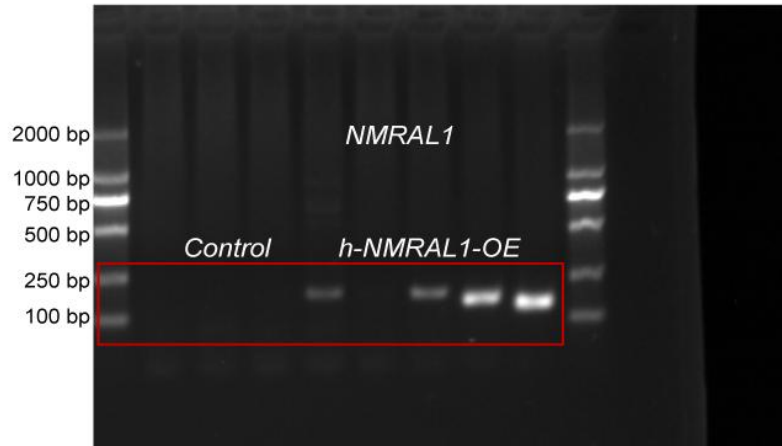

#### *Actb*

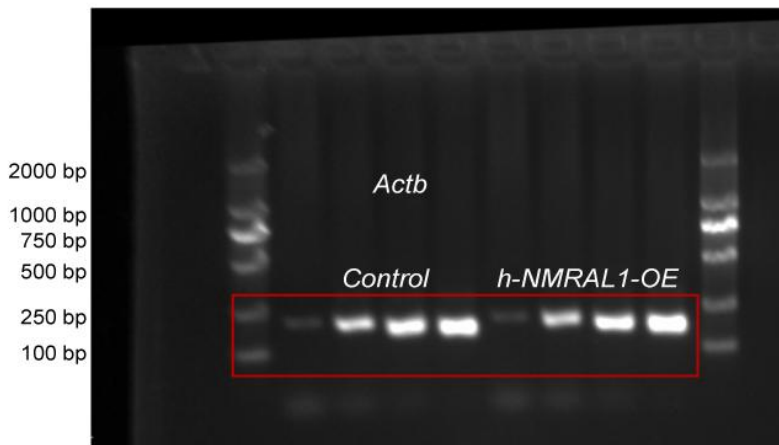

Original gels of Supplementary Fig. 15B
